# Supplementary material for: Overdiagnosis and overuse of diagnostic and screening tests in low-income and middle-income countries: a scoping review
Source: HighWire-hosted journal article supplement (doi:10.1136/bmjgh-2022-008696), 2022-10-01
Supplement: bmjgh-2022-008696supp001_data_supplement.pdf [file bmjgh-2022-008696supp001_data_supplement.pdf]

**Supplementary Materials**

**Supplementary 1:** Search strategy

**Supplementary 2:** Table S1. Detailed characteristics of all included studies

## Supplementary 1: Search strategy

### PubMed

("Medical Overuse"[Mesh] OR "Unnecessary Procedures"[Mesh] OR Overdiagnosis[tiab] OR "Over-diagnosis"[tiab] OR "Over diagnosis"[tiab] OR "Unnecessary Procedures"[tiab] OR Overtreating[tiab] OR Overtreatment[tiab] OR Overmedicalization[tiab] OR Overmedicalisation[tiab] OR ((Overuse[ti] OR Unnecessary[ti] OR Unwarranted[ti] OR Inappropriate[ti] OR De-implementation[tiab] OR Deimplementation[tiab]) AND (Medication[tiab] OR Therapeutic[tiab] OR Antibiotics[tiab] OR Operation[tiab] OR Operations[tiab] OR Medical[ti])))

AND

(Overdiagnosis[tiab] OR "Over-diagnosis"[tiab] OR "Over diagnosis"[tiab] OR ((Overuse[ti] OR Overtreatment[tiab]) AND (Tests[tiab] OR Test[tiab] OR Screening[tiab]))) OR (("Diagnosis"[Mesh] OR "diagnosis"[sh] OR "diagnostic imaging"[sh] OR Diagnosis[tiab] OR Diagnostic[tiab] OR "Visual assessment"[tiab] OR "Visual assessment"[tiab]) AND ("Unnecessary Procedures"[Mesh] OR "Medical Overuse"[Mesh] OR Threshold[tiab] OR Thresholds[tiab] OR Overuse[tiab])))

AND

(afghanistan[Text Word] OR albania[Text Word] OR algeria[Text Word] OR american samoa[Text Word] OR angola[Text Word] OR antigua[Text Word] OR barbuda[Text Word] OR argentina[Text Word] OR armenia[Text Word] OR armenian[Text Word] OR aruba[Text Word] OR azerbaijan[Text Word] OR bahrain[Text Word] OR bangladesh[Text Word] OR barbados[Text Word] OR belarus[Text Word] OR byelarus[Text Word] OR belorussia[Text Word] OR byelorussian[Text Word] OR belize[Text Word] OR british honduras[Text Word] OR benin[Text Word] OR dahomey[Text Word] OR bhutan[Text Word] OR bolivia[Text Word] OR bosnia[Text Word] OR herzegovina[Text Word] OR botswana[Text Word] OR bechuanaland[Text Word] OR brazil[Text Word] OR brasil[Text Word] OR bulgaria[Text Word] OR burkina faso[Text Word] OR burkina fasso[Text Word] OR upper volta[Text Word] OR burundi[Text Word] OR urundi[Text Word] OR cabo verde[Text Word] OR cape verde[Text Word] OR cambodia[Text Word] OR kampuchea[Text Word] OR khmer republic[Text Word] OR cameroon[Text Word] OR cameron[Text Word] OR cameroun[Text Word] OR central african republic[Text Word] OR ubangi shari[Text Word] OR chad[Text Word] OR chile[Text Word] OR china[Text Word] OR colombia[Text Word] OR comoros[Text Word] OR comoro islands[Text Word] OR mayotte[Text Word] OR congo[Text Word] OR zaire[Text Word] OR costa rica[Text Word] OR cote d'ivoire[Text Word] OR cote d'ivoire[Text Word] OR cote divoire[Text Word] OR cote d ivoire[Text Word] OR ivory coast[Text Word] OR croatia[Text Word] OR cuba[Text Word] OR cyprus[Text Word] OR czech republic[Text Word] OR czechoslovakia[Text Word] OR djibouti[Text Word] OR french somaliland[Text Word] OR dominica[Text Word] OR dominican republic[Text Word] OR ecuador[Text Word] OR egypt[Text Word] OR united arab republic[Text Word] OR el salvador[Text Word] OR equatorial guinea[Text Word] OR spanish guinea[Text Word] OR eritrea[Text Word] OR estonia[Text Word] OR eswatini[Text Word] OR swaziland[Text Word] OR ethiopia[Text Word] OR fiji[Text Word] OR gabon[Text Word] OR gabonese republic[Text Word] OR gambia[Text Word] OR georgia[Text Word] OR georgian[Text Word] OR ghana[Text Word] OR gold coast[Text Word] OR gibraltar[Text Word] OR greece[Text Word] OR grenada[Text Word] OR guam[Text Word] OR guatemala[Text Word] OR guinea[Text Word] OR guyana[Text Word] OR guiana[Text Word] OR haiti[Text Word] OR hispaniola[Text Word] OR honduras[Text Word] OR hungary[Text Word] OR india[Text Word] OR indonesia[Text Word] OR timor[Text Word] OR iran[Text Word] OR iraq[Text Word] OR isle of man[Text Word] OR jamaica[Text Word] OR jordan[Text Word] OR kazakhstan[Text Word] OR kazakh[Text Word] OR kenya[Text Word] OR korea[Text Word] OR kosovo[Text Word] OR kyrgyzstan[Text Word] OR kirghizia[Text Word] OR kirgizstan[Text Word] OR kyrgyz republic[Text Word] OR kirghiz[Text Word] OR laos[Text Word] OR lao pdr[Text Word] OR lao people's democratic republic[Text Word] OR latvia[Text Word] OR lebanon[Text Word] OR lesotho[Text Word] OR basutoland[Text Word] OR liberia[Text Word] OR libya[Text Word] OR libyan arab jamahiriya[Text Word] OR lithuania[Text Word] OR macau[Text Word] OR macao[Text Word] OR macedonia[Text Word] OR madagascar[Text Word] OR malagasy republic[Text Word] OR malawi[Text

Word] OR nyasaland[Text Word] OR malaysia[Text Word] OR maldives[Text Word] OR indian ocean[Text Word] OR mali[Text Word] OR malta[Text Word] OR micronesia[Text Word] OR kiribati[Text Word] OR marshall islands[Text Word] OR nauru[Text Word] OR northern mariana islands[Text Word] OR palau[Text Word] OR tuvalu[Text Word] OR mauritania[Text Word] OR mauritius[Text Word] OR mexico[Text Word] OR moldova[Text Word] OR moldovian[Text Word] OR mongolia[Text Word] OR montenegro[Text Word] OR morocco[Text Word] OR ifni[Text Word] OR mozambique[Text Word] OR portuguese east africa[Text Word] OR myanmar[Text Word] OR burma[Text Word] OR namibia[Text Word] OR nepal[Text Word] OR netherlands antilles[Text Word] OR nicaragua[Text Word] OR niger[Text Word] OR nigeria[Text Word] OR oman[Text Word] OR muscat[Text Word] OR pakistan[Text Word] OR panama[Text Word] OR papua new guinea[Text Word] OR paraguay[Text Word] OR peru[Text Word] OR philippines[Text Word] OR philipines[Text Word] OR phillipines[Text Word] OR poland[Text Word] OR polish people's republic[Text Word] OR portugal[Text Word] OR portuguese republic[Text Word] OR puerto rico[Text Word] OR romania[Text Word] OR russia[Text Word] OR russian federation[Text Word] OR ussr[Text Word] OR soviet union[Text Word] OR union of soviet socialist republics[Text Word] OR rwanda[Text Word] OR ruanda[Text Word] OR samoa[Text Word] OR pacific islands[Text Word] OR polynesia[Text Word] OR samoan islands[Text Word] OR sao tome and principe[Text Word] OR saudi arabia[Text Word] OR senegal[Text Word] OR serbia[Text Word] OR seychelles[Text Word] OR sierra leone[Text Word] OR slovakia[Text Word] OR slovak republic[Text Word] OR slovenia[Text Word] OR melanesia[Text Word] OR solomon island[Text Word] OR solomon islands[Text Word] OR norfolk island[Text Word] OR somalia[Text Word] OR south africa[Text Word] OR south sudan[Text Word] OR sri lanka[Text Word] OR ceylon[Text Word] OR saint kitts and nevis[Text Word] OR st kitts and nevis[Text Word] OR saint lucia[Text Word] OR st lucia[Text Word] OR saint vincent[Text Word] OR st vincent[Text Word] OR grenadines[Text Word] OR sudan[Text Word] OR suriname[Text Word] OR surinam[Text Word] OR syria[Text Word] OR syrian arab republic[Text Word] OR tajikistan[Text Word] OR tadjikistan[Text Word] OR tadhikistan[Text Word] OR tadhik[Text Word] OR tanzania[Text Word] OR tanganyika[Text Word] OR thailand[Text Word] OR siam[Text Word] OR timor leste[Text Word] OR east timor[Text Word] OR togo[Text Word] OR togolese republic[Text Word] OR tonga[Text Word] OR trinidad[Text Word] OR tobago[Text Word] OR tunisia[Text Word] OR turkey[Text Word] OR turkmenistan[Text Word] OR turkmen[Text Word] OR uganda[Text Word] OR ukraine[Text Word] OR uruguay[Text Word] OR uzbekistan[Text Word] OR uzbek[Text Word] OR vanuatu[Text Word] OR new hebrides[Text Word] OR venezuela[Text Word] OR vietnam[Text Word] OR viet nam[Text Word] OR middle east[Text Word] OR west bank[Text Word] OR gaza[Text Word] OR palestine[Text Word] OR yemen[Text Word] OR yugoslavia[Text Word] OR zambia[Text Word] OR zimbabwe[Text Word] OR northern rhodesia[Text Word] OR global south[Text Word] OR africa south of the sahara[Text Word] OR sub saharan africa[Text Word] OR subsaharan africa[Text Word] OR central africa[Text Word] OR north africa[Text Word] OR northern africa[Text Word] OR magreb[Text Word] OR maghrib[Text Word] OR sahara[Text Word] OR southern africa[Text Word] OR east africa[Text Word] OR eastern africa[Text Word] OR west africa[Text Word] OR western africa[Text Word] OR west indies[Text Word] OR indian ocean islands[Text Word] OR caribbean[Text Word] OR central america[Text Word] OR latin america[Text Word] OR south america[Text Word] OR central asia[Text Word] OR north asia[Text Word] OR northern asia[Text Word] OR southeastern asia[Text Word] OR south eastern asia[Text Word] OR southeast asia[Text Word] OR south east asia[Text Word] OR western asia[Text Word] OR east europe[Text Word] OR eastern europe[Text Word] OR developing country[Text Word] OR developing countries[Text Word] OR developing nation[Text Word] OR developing nations[Text Word] OR developing population[Text Word] OR developing populations[Text Word] OR developing world[Text Word] OR less developed country[Text Word] OR less developed countries[Text Word] OR less developed nation[Text Word] OR less developed nations[Text Word] OR less developed world[Text Word] OR lesser developed countries[Text Word] OR lesser developed nations[Text Word] OR under developed country[Text Word] OR under developed countries[Text Word] OR under developed nations[Text Word] OR under developed world[Text Word] OR underdeveloped country[Text Word] OR underdeveloped countries[Text Word] OR underdeveloped nation[Text Word] OR

underdeveloped nations[Text Word] OR underdeveloped population[Text Word] OR underdeveloped populations[Text Word] OR underdeveloped world[Text Word] OR middle income country[Text Word] OR middle income countries[Text Word] OR middle income nation[Text Word] OR middle income nations[Text Word] OR middle income population[Text Word] OR middle income populations[Text Word] OR low income country[Text Word] OR low income countries[Text Word] OR low income nation[Text Word] OR low income nations[Text Word] OR low income population[Text Word] OR low income populations[Text Word] OR lower income country[Text Word] OR lower income countries[Text Word] OR lower income nations[Text Word] OR lower income population[Text Word] OR lower income populations[Text Word] OR underserved countries[Text Word] OR underserved nations[Text Word] OR underserved population[Text Word] OR underserved populations[Text Word] OR under served population[Text Word] OR under served populations[Text Word] OR deprived countries[Text Word] OR deprived population[Text Word] OR deprived populations[Text Word] OR poor country[Text Word] OR poor countries[Text Word] OR poor nation[Text Word] OR poor nations[Text Word] OR poor population[Text Word] OR poor populations[Text Word] OR poor world[Text Word] OR poorer countries[Text Word] OR poorer nations[Text Word] OR poorer population[Text Word] OR poorer populations[Text Word] OR developing economy[Text Word] OR developing economies[Text Word] OR less developed economy[Text Word] OR less developed economies[Text Word] OR underdeveloped economies[Text Word] OR middle income economy[Text Word] OR middle income economies[Text Word] OR low income economy[Text Word] OR low income economies[Text Word] OR lower income economies[Text Word] OR low gdp[Text Word] OR low gnp[Text Word] OR low gross domestic[Text Word] OR low gross national[Text Word] OR lower gdp[Text Word] OR lower gross domestic[Text Word] OR lmic[Text Word] OR lmic[Text Word] OR third world[Text Word] OR lami country[Text Word] OR lami countries[Text Word] OR transitional country[Text Word] OR transitional countries[Text Word] OR emerging economies[Text Word] OR emerging nation[Text Word] OR emerging nations[Text Word])

### Embase

("Unnecessary Procedure"/exp OR Overdiagnosis:ti,ab OR Over-diagnosis:ti,ab OR "Over diagnosis":ti,ab OR "Unnecessary Procedures":ti,ab OR Overtreating:ti,ab OR Overtreatment:ti,ab OR Overmedicalization:ti,ab OR Overmedicalisation:ti,ab OR ((Overuse:ti OR Unnecessary:ti OR Unwarranted:ti OR Inappropriate:ti OR De-implementation:ti,ab OR Deimplementation:ti,ab) AND (Medication:ti,ab OR Therapeutic:ti,ab OR Antibiotics:ti,ab OR Operation:ti,ab OR Operations:ti,ab OR Medical:ti)))

AND

(Overdiagnosis:ti,ab OR Over-diagnosis:ti,ab OR "Over diagnosis":ti,ab OR ((Overuse:ti OR Overtreatment:ti,ab) AND (Tests:ti,ab OR Test:ti,ab OR Screening:ti,ab)) OR ((Diagnosis/exp OR Diagnosis:ti,ab OR Diagnostic:ti,ab OR "Visual assessment":ti,ab OR "Visual assessment":ti,ab) AND ("Unnecessary Procedure"/exp OR Threshold:ti,ab OR Thresholds:ti,ab OR Overuse:ti,ab)))

AND

(afghanistan OR albania OR algeria OR "american samoa" OR angola OR antigua OR barbuda OR argentina OR armenia OR armenian OR aruba OR azerbaijan OR bahrain OR bangladesh OR barbados OR belarus OR byelarus OR belorussia OR byelorussian OR belize OR "british honduras" OR benin OR dahomey OR bhutan OR bolivia OR bosnia OR herzegovina OR botswana OR bechuanaland OR brazil OR brasil OR bulgaria OR "burkina faso" OR "burkina fasso" OR "upper volta" OR burundi OR urundi OR "cabo verde" OR "cape verde" OR cambodia OR kampuchea OR "khmer republic" OR cameroon OR cameron OR cameroun OR "central african republic" OR "ubangi shari" OR chad OR chile OR china OR colombia OR comoros OR "comoro islands" OR mayotte OR congo OR zaire OR "costa rica" OR "cote divoire" OR "cote d ivoire" OR "cote divoire" OR "cote d ivoire" OR "ivory coast" OR croatia OR cuba OR cyprus OR "czech republic" OR czechoslovakia OR djibouti OR "french somaliland" OR dominica OR "dominican republic" OR ecuador OR egypt OR "united arab republic" OR "el salvador" OR "equatorial guinea" OR "spanish guinea" OR eritrea OR estonia OR eswatini OR swaziland OR ethiopia OR fiji OR gabon OR "gabonese republic" OR gambia OR

georgia OR georgian OR ghana OR "gold coast" OR gibraltar OR greece OR grenada OR guam OR guatemala OR guinea OR guyana OR guiana OR haiti OR hispaniola OR honduras OR hungary OR india OR indonesia OR timor OR iran OR iraq OR "isle of man" OR jamaica OR jordan OR kazakhstan OR kazakh OR kenya OR korea OR kosovo OR kyrgyzstan OR kirghizia OR kirgizstan OR "kyrgyz republic" OR kirghiz OR laos OR "lao pdr" OR "lao peoples democratic republic" OR latvia OR lebanon OR lesotho OR basutoland OR liberia OR libya OR "libyan arab jamahiriya" OR lithuania OR macau OR macao OR macedonia OR madagascar OR "malagasy republic" OR malawi OR nyasaland OR malaysia OR maldives OR "indian ocean" OR mali OR malta OR micronesia OR kiribati OR "marshall islands" OR nauru OR "northern mariana islands" OR palau OR tuvalu OR mauritania OR mauritius OR mexico OR moldova OR moldovian OR mongolia OR montenegro OR morocco OR ifni OR mozambique OR "portuguese east africa" OR myanmar OR burma OR namibia OR nepal OR "netherlands antilles" OR nicaragua OR niger OR nigeria OR oman OR muscat OR pakistan OR panama OR "papua new guinea" OR paraguay OR peru OR philippines OR philipines OR phillipines OR philippines OR poland OR "polish peoples republic" OR portugal OR "portuguese republic" OR "puerto rico" OR romania OR russia OR "russian federation" OR ussr OR "soviet union" OR "union of soviet socialist republics" OR russia OR ruanda OR samoa OR "pacific islands" OR polynesia OR "samoan islands" OR "sao tome" AND principe OR "saudi arabia" OR senegal OR serbia OR seychelles OR "sierra leone" OR slovakia OR "slovak republic" OR slovenia OR melanesia OR "solomon island" OR "solomon islands" OR "norfolk island" OR somalia OR "south africa" OR "south sudan" OR "sri lanka" OR ceylon OR "saint kitts" AND nevis OR "st kitts" AND nevis OR "saint lucia" OR "st lucia" OR "saint vincent" OR "st vincent" OR grenadines OR sudan OR suriname OR surinam OR syria OR "syrian arab republic" OR tajikistan OR tadjikistan OR tadjhikistan OR tadjhik OR tanzania OR tanganyika OR thailand OR siam OR "timor leste" OR "east timor" OR togo OR "togolese republic" OR tonga OR trinidad OR tobago OR tunisia OR turkey OR turkmenistan OR turkmen OR uganda OR ukraine OR uruguay OR uzbekistan OR uzbek OR vanuatu OR "new hebrides" OR venezuela OR vietnam OR "viet nam" OR "middle east" OR "west bank" OR gaza OR palestine OR yemen OR yugoslavia OR zambia OR zimbabwe OR "northern rhodesia" OR "global south" OR "africa south of the sahara" OR "sub saharan africa" OR "subsaharan africa" OR "central africa" OR "north africa" OR "northern africa" OR magreb OR maghrib OR sahara OR "southern africa" OR "east africa" OR "eastern africa" OR "west africa" OR "western africa" OR "west indies" OR "indian ocean islands" OR caribbean OR "central america" OR "latin america" OR "south america" OR "central asia" OR "north asia" OR "northern asia" OR "southeastern asia" OR "south eastern asia" OR "southeast asia" OR "south east asia" OR "western asia" OR "east europe" OR "eastern europe" OR "developing country" OR "developing countries" OR "developing nation" OR "developing nations" OR "developing population" OR "developing populations" OR "developing world" OR "less developed country" OR "less developed countries" OR "less developed nation" OR "less developed nations" OR "less developed world" OR "lesser developed countries" OR "lesser developed nations" OR "under developed country" OR "under developed countries" OR "under developed nations" OR "under developed world" OR "underdeveloped country" OR "underdeveloped countries" OR "underdeveloped nation" OR "underdeveloped nations" OR "underdeveloped population" OR "underdeveloped populations" OR "underdeveloped world" OR "middle income country" OR "middle income countries" OR "middle income nation" OR "middle income nations" OR "middle income population" OR "middle income populations" OR "low income country" OR "low income countries" OR "low income nation" OR "low income nations" OR "low income population" OR "low income populations" OR "lower income country" OR "lower income countries" OR "lower income nations" OR "lower income population" OR "lower income populations" OR "underserved countries" OR "underserved nations" OR "underserved population" OR "underserved populations" OR "under served population" OR "under served populations" OR "deprived countries" OR "deprived population" OR "deprived populations" OR "poor country" OR "poor countries" OR "poor nation" OR "poor nations" OR "poor population" OR "poor populations" OR "poor world" OR "poorer countries" OR "poorer nations" OR "poorer population" OR "poorer populations" OR "developing economy" OR "developing economies" OR "less developed economy" OR "less developed economies" OR "underdeveloped economies" OR "middle income economy" OR "middle income economies" OR "low income economy" OR "low income economies" OR "lower income economies" OR

"low gdp" OR "low gnp" OR "low gross domestic" OR "low gross national" OR "lower gdp" OR "lower gross domestic" OR "third world" OR "lami country" OR "lami countries" OR "transitional country" OR "transitional countries" OR "emerging economies" OR "emerging nation" OR "emerging nations")

### PsycINFO

(Overdiagnosis.ti,ab. OR Over-diagnosis.ti,ab. OR "Over diagnosis".ti,ab. OR ((Overuse.ti. OR Overtreatment.ti,ab.) AND (Tests.ti,ab. OR Test.ti,ab. OR Screening.ti,ab.)) OR ((exp Diagnosis/ OR "Diagnosis" OR "Diagnostic Imaging" OR Diagnosis.ti,ab. OR Diagnostic.ti,ab. OR "Visual assessment".ti,ab. OR "Visual assessment".ti,ab.) AND (Thresholds.ti,ab. OR Overuse.ti,ab.)))

AND

(afghanistan.mp. OR albania.mp. OR algeria.mp. OR "american samoa".mp. OR angola.mp. OR antigua.mp. OR barbuda.mp. OR argentina.mp. OR armenia.mp. OR armenian.mp. OR aruba.mp. OR azerbaijan.mp. OR bahrain.mp. OR bangladesh.mp. OR barbados.mp. OR belarus.mp. OR byelarus.mp. OR belorussia.mp. OR byelorussian.mp. OR belize.mp. OR "british honduras".mp. OR benin.mp. OR dahomey.mp. OR bhutan.mp. OR bolivia.mp. OR bosnia.mp. OR herzegovina.mp. OR botswana.mp. OR bechuanaland.mp. OR brazil.mp. OR brasil.mp. OR bulgaria.mp. OR "burkina faso".mp. OR "burkina fasso".mp. OR "upper volta".mp. OR burundi.mp. OR urundi.mp. OR "cabo verde".mp. OR "cape verde".mp. OR cambodia.mp. OR kampuchea.mp. OR "khmer republic".mp. OR cameroon.mp. OR cameron.mp. OR cameroun.mp. OR "central african republic".mp. OR "ubangi shari".mp. OR chad.mp. OR chile.mp. OR china.mp. OR colombia.mp. OR comoros.mp. OR "comoro islands".mp. OR mayotte.mp. OR congo.mp. OR zaire.mp. OR "costa rica".mp. OR "cote d'ivoire".mp. OR "cote d'ivoire".mp. OR "cote divoire".mp. OR "cote d ivoire".mp. OR "ivory coast".mp. OR croatia.mp. OR cuba.mp. OR cyprus.mp. OR "czech republic".mp. OR czechoslovakia.mp. OR djibouti.mp. OR "french somaliland".mp. OR dominica.mp. OR "dominican republic".mp. OR ecuador.mp. OR egypt.mp. OR "united arab republic".mp. OR "el salvador".mp. OR "equatorial guinea".mp. OR "spanish guinea".mp. OR eritrea.mp. OR estonia.mp. OR eswatini.mp. OR swaziland.mp. OR ethiopia.mp. OR fiji.mp. OR gabon.mp. OR "gabonese republic".mp. OR gambia.mp. OR georgia.mp. OR georgian.mp. OR ghana.mp. OR "gold coast".mp. OR gibraltar.mp. OR greece.mp. OR grenada.mp. OR guam.mp. OR guatemala.mp. OR guinea.mp. OR guyana.mp. OR guiana.mp. OR haiti.mp. OR hispaniola.mp. OR honduras.mp. OR hungary.mp. OR india.mp. OR indonesia.mp. OR timor.mp. OR iran.mp. OR iraq.mp. OR "isle of man".mp. OR jamaica.mp. OR jordan.mp. OR kazakhstan.mp. OR kazakh.mp. OR kenya.mp. OR korea.mp. OR kosovo.mp. OR kyrgyzstan.mp. OR kirghizia.mp. OR kirgizstan.mp. OR "kyrgyz republic".mp. OR kirghiz.mp. OR laos.mp. OR "lao pdr".mp. OR "lao people's democratic republic".mp. OR latvia.mp. OR lebanon.mp. OR lesotho.mp. OR basutoland.mp. OR liberia.mp. OR libya.mp. OR "libyan arab jamahiriya".mp. OR lithuania.mp. OR macau.mp. OR macao.mp. OR macedonia.mp. OR madagascar.mp. OR "malagasy republic".mp. OR malawi.mp. OR nyasaland.mp. OR malaysia.mp. OR maldives.mp. OR "indian ocean".mp. OR mali.mp. OR malta.mp. OR micronesia.mp. OR kiribati.mp. OR "marshall islands".mp. OR nauru.mp. OR "northern mariana islands".mp. OR palau.mp. OR tuvalu.mp. OR mauritania.mp. OR mauritius.mp. OR mexico.mp. OR moldova.mp. OR moldovian.mp. OR mongolia.mp. OR montenegro.mp. OR morocco.mp. OR ifni.mp. OR mozambique.mp. OR "portuguese east africa".mp. OR myanmar.mp. OR burma.mp. OR namibia.mp. OR nepal.mp. OR "netherlands antilles".mp. OR nicaragua.mp. OR niger.mp. OR nigeria.mp. OR oman.mp. OR muscat.mp. OR pakistan.mp. OR panama.mp. OR "papua new guinea".mp. OR paraguay.mp. OR peru.mp. OR philippines.mp. OR philipines.mp. OR philippines.mp. OR poland.mp. OR "polish people's republic".mp. OR portugal.mp. OR "portuguese republic".mp. OR "puerto rico".mp. OR romania.mp. OR russia.mp. OR "russian federation".mp. OR ussr.mp. OR "soviet union".mp. OR "union of soviet socialist republics".mp. OR rwanda.mp. OR ruanda.mp. OR samoa.mp. OR "pacific islands".mp. OR polynesia.mp. OR "samoan islands".mp. OR "sao tome" AND principe.mp. OR "saudi arabia".mp. OR senegal.mp. OR serbia.mp. OR seychelles.mp. OR "sierra leone".mp. OR slovakia.mp. OR "slovak republic".mp. OR slovenia.mp. OR melanesia.mp. OR "solomon island".mp. OR "solomon islands".mp. OR "norfolk island".mp. OR

somalia.mp. OR "south africa".mp. OR "south sudan".mp. OR "sri lanka".mp. OR ceylon.mp. OR "saint kitts" AND nevis.mp. OR "st kitts" AND nevis.mp. OR "saint lucia".mp. OR "st lucia".mp. OR "saint vincent".mp. OR "st vincent".mp. OR grenadines.mp. OR sudan.mp. OR suriname.mp. OR surinam.mp. OR syria.mp. OR "syrian arab republic".mp. OR tajikistan.mp. OR tadjikistan.mp. OR tadjhikistan.mp. OR tadjhik.mp. OR tanzania.mp. OR tanganyika.mp. OR thailand.mp. OR siam.mp. OR "timor leste".mp. OR "east timor".mp. OR togo.mp. OR "togolese republic".mp. OR tonga.mp. OR trinidad.mp. OR tobago.mp. OR tunisia.mp. OR turkey.mp. OR turkmenistan.mp. OR turkmen.mp. OR uganda.mp. OR ukraine.mp. OR uruguay.mp. OR uzbekistan.mp. OR uzbek.mp. OR vanuatu.mp. OR "new hebrides".mp. OR venezuela.mp. OR vietnam.mp. OR "viet nam".mp. OR "middle east".mp. OR "west bank".mp. OR gaza.mp. OR palestine.mp. OR yemen.mp. OR yugoslavia.mp. OR zambia.mp. OR zimbabwe.mp. OR "northern rhodesia".mp. OR "global south".mp. OR "africa south of the sahara".mp. OR "sub saharan africa".mp. OR "subsaharan africa".mp. OR "central africa".mp. OR "north africa".mp. OR "northern africa".mp. OR magreb.mp. OR maghrib.mp. OR sahara.mp. OR "southern africa".mp. OR "east africa".mp. OR "eastern africa".mp. OR "west africa".mp. OR "western africa".mp. OR "west indies".mp. OR "indian ocean islands".mp. OR caribbean.mp. OR "central america".mp. OR "latin america".mp. OR "south america".mp. OR "central asia".mp. OR "north asia".mp. OR "northern asia".mp. OR "southeastern asia".mp. OR "south eastern asia".mp. OR "southeast asia".mp. OR "south east asia".mp. OR "western asia".mp. OR "east europe".mp. OR "eastern europe".mp. OR "developing country".mp. OR "developing countries".mp. OR "developing nation".mp. OR "developing nations".mp. OR "developing population".mp. OR "developing populations".mp. OR "developing world".mp. OR "less developed country".mp. OR "less developed countries".mp. OR "less developed nation".mp. OR "less developed nations".mp. OR "less developed world".mp. OR "lesser developed countries".mp. OR "lesser developed nations".mp. OR "under developed country".mp. OR "under developed countries".mp. OR "under developed nations".mp. OR "under developed world".mp. OR "underdeveloped country".mp. OR "underdeveloped countries".mp. OR "underdeveloped nation".mp. OR "underdeveloped nations".mp. OR "underdeveloped population".mp. OR "underdeveloped populations".mp. OR "underdeveloped world".mp. OR "middle income country".mp. OR "middle income countries".mp. OR "middle income nation".mp. OR "middle income nations".mp. OR "middle income population".mp. OR "middle income populations".mp. OR "low income country".mp. OR "low income countries".mp. OR "low income nation".mp. OR "low income nations".mp. OR "low income population".mp. OR "low income populations".mp. OR "lower income country".mp. OR "lower income countries".mp. OR "lower income nations".mp. OR "lower income population".mp. OR "lower income populations".mp. OR "underserved countries".mp. OR "underserved nations".mp. OR "underserved population".mp. OR "underserved populations".mp. OR "under served population".mp. OR "under served populations".mp. OR "deprived countries".mp. OR "deprived population".mp. OR "deprived populations".mp. OR "poor country".mp. OR "poor countries".mp. OR "poor nation".mp. OR "poor nations".mp. OR "poor population".mp. OR "poor populations".mp. OR "poor world".mp. OR "poorer countries".mp. OR "poorer nations".mp. OR "poorer population".mp. OR "poorer populations".mp. OR "developing economy".mp. OR "developing economies".mp. OR "less developed economy".mp. OR "less developed economies".mp. OR "underdeveloped economies".mp. OR "middle income economy".mp. OR "middle income economies".mp. OR "low income economy".mp. OR "low income economies".mp. OR "lower income economies".mp. OR "low gdp".mp. OR "low gnp".mp. OR "low gross domestic".mp. OR "low gross national".mp. OR "lower gdp".mp. OR "lower gross domestic".mp. OR lmic.mp. OR lmic.mp. OR "third world".mp. OR "lami country".mp. OR "lami countries".mp. OR "transitional country".mp. OR "transitional countries".mp. OR "emerging economies".mp. OR "emerging nation".mp. OR "emerging nations".mp.)

**Global Index Medicus (WPRIM (Western Pacific); LILACS (Americas); IMSEAR (South-East Asia); IMEMR (Eastern Mediterranean); AIM (Africa))**

("Medical Overuse" OR "Unnecessary Procedures" OR Overdiagnosis OR "Over diagnosis" OR "Unnecessary Procedures" OR Overtreating OR Overtreatment OR Overmedicalisation OR Overmedicalisation OR

((Overuse OR Unnecessary OR Unwarranted OR Inappropriate OR De-implementation OR Deimplementation) AND (Medication OR Therapeutic OR Antibiotics OR Operation OR Operations OR Medical)))

AND

(Overdiagnosis OR Over-diagnosis OR "Over diagnosis" OR ((Overuse OR Overtreatment) AND (Tests OR Test OR Screening)) OR ((Diagnosis OR "Diagnosis" OR "Diagnostic Imaging" OR Diagnosis OR Diagnostic OR "Visual assessment" OR "Visual assessment") AND ("Unnecessary Procedures" OR "Medical Overuse" OR Threshold OR Thresholds OR Overuse)))



**Supplementary 2:** Table S1. Detailed characteristics of all included studies**Table S1. Characteristics of included studies in the scoping review (n=129)**

| <b>Author, Year<br/>Country, Income<br/>level</b>          | <b>Title, Journal</b>                                                                                                                             | <b>Study design, Analysis<br/>approach, Sample size</b>                        | <b>Condition, Diagnostic or<br/>screening Test,</b> | <b>Main context, Main<br/>theme, financial<br/>implications</b>                    |
|------------------------------------------------------------|---------------------------------------------------------------------------------------------------------------------------------------------------|--------------------------------------------------------------------------------|-----------------------------------------------------|------------------------------------------------------------------------------------|
| Ahmadi K et al 2014<br>Iran, Upper middle<br>income        | Impact of intravenous acetaminophen therapy on the necessity of cervical spine imaging in patients with cervical spine trauma<br>Chin J Traumatol | Observational e.g. cohort or cross-sectional studies<br>Quantitative (n= 1309) | Condition: Trauma<br>Test: Imaging - CT, X-ray      | Overuse of tests<br>Potential Solutions<br>Financial Impact: No                    |
| Alimoglu O et al<br>2020<br>Turkey, Upper<br>middle income | Do all detected thyroid cancers correspond to 'real cancer'?<br>Br J Surg                                                                         | Observational e.g. cohort or cross-sectional studies<br>Quantitative (n= 335)  | Condition: Cancer<br>Test: N/A                      | Overdiagnosis<br>Overdiagnosis or Overuse of tests estimation<br>Financial Impact: |
| Almenas M et al<br>2018<br>Latin America,                  | Prevención cuaternaria: como hacer, como enseñar<br>Rev bras med fam comunidade                                                                   | Observational e.g. cohort or cross-sectional studies<br>Mixed (n= 309)         | Condition: N/A<br>Test: N/A                         | Both<br>Potential Solutions<br>Financial Impact:                                   |

|                                                         |                                                                                                                                                      |                                                                                 |                                                      |                                                                                                                |
|---------------------------------------------------------|------------------------------------------------------------------------------------------------------------------------------------------------------|---------------------------------------------------------------------------------|------------------------------------------------------|----------------------------------------------------------------------------------------------------------------|
| Alpay Ozbek O et al 2007<br>Turkey, Upper middle income | [Unnecessary test repeats in viral hepatitis serology]<br>Mikrobiyol Bul                                                                             | Observational e.g. cohort or cross-sectional studies<br>Quantitative (n= 23705) | Condition: Infectious<br>Test: Pathology - Hepatitis | Overuse of tests<br>Overdiagnosis or Overuse of tests estimation<br>Financial Impact: Yes                      |
| Al-Selwi K 2009<br>Yemen, Low income                    | Overdiagnosis of malaria among the health services providers in Hodeida-Yemen<br>Giornale Italiano di Medicina Tropicale                             | Observational e.g. cohort or cross-sectional studies<br>Qualitative (n= N/A)    | Condition: Infectious<br>Test: N/A                   | Overdiagnosis<br>Drivers and factors related to OD or overuse of tests<br>Financial Impact:                    |
| Ameyaw E et al 2014<br>Ghana, Lower middle income       | The outcome of a test-treat package versus routine outpatient care for Ghanaian children with fever: a pragmatic randomized control trial<br>Malar J | Interventional e.g. randomised trial<br>Quantitative (n= 240)                   | Condition: Infectious<br>Test: N/A                   | Both<br>Impact on further testing or treatment i.e. consequence of OD or Overuse of tests<br>Financial Impact: |
| Ansah EK et al 2015<br>Ghana, Lower middle income       | The impact of providing rapid diagnostic malaria tests on fever management in the private retail sector in Ghana: a cluster randomized trial<br>BMJ  | Interventional e.g. randomised trial<br>Quantitative (n= 4603)                  | Condition: Infectious<br>Test: N/A                   | Both<br>Potential Solutions<br>Financial Impact: No                                                            |

|                                                              |                                                                                                                                                                 |                                                                                |                                                         |                                                                                                                            |
|--------------------------------------------------------------|-----------------------------------------------------------------------------------------------------------------------------------------------------------------|--------------------------------------------------------------------------------|---------------------------------------------------------|----------------------------------------------------------------------------------------------------------------------------|
| Arena TR et al 2014<br>Brazil, Upper middle income           | [Spending with unnecessary complementary tests for hypertension and diabetes in health services]<br>Rev Gaucha Enferm                                           | Observational e.g. cohort or cross-sectional studies<br>Quantitative (n= 293)  | Condition: CVD<br>Test: N/A                             | Overuse of tests<br>Overdiagnosis or Overuse of tests estimation<br>Financial Impact: No                                   |
| Aroonpruksakul N et al 2015<br>Thailand, Upper middle income | The prevalence of inappropriate blood tests in pediatric patients scheduled for elective surgery in Thailand: A retrospective chart review<br>Asian Biomedicine | Observational e.g. cohort or cross-sectional studies<br>Quantitative (n= 285)  | Condition: N/A<br>Test: Pathology - Pre-operative tests | Overuse of tests<br>Overdiagnosis or Overuse of tests estimation<br>Financial Impact: Yes                                  |
| Aske H et al 2015<br>Cameroon, Lower middle income           | Febrile Illness and Intravenous Antimalarial Treatment at a District Hospital in Cameroon<br>West Afr J Med                                                     | Observational e.g. cohort or cross-sectional studies<br>Quantitative (n= 91)   | Condition: Infectious<br>Test: N/A                      | Overdiagnosis<br>Impact on further testing or treatment i.e. consequence of OD or Overuse of tests<br>Financial Impact: No |
| Attard SM et al 2015<br>China, Upper middle income           | Implications of iron deficiency/anemia on the classification of diabetes using HbA1c<br>Nutr Diabetes                                                           | Observational e.g. cohort or cross-sectional studies<br>Quantitative (n= 7308) | Condition: Diabetes<br>Test: N/A                        | Overdiagnosis<br>Drivers and factors related to OD or overuse of tests<br>Financial Impact: No                             |

|                                                                  |                                                                                                                                                                                                |                                                                                   |                                                     |                                                                                              |
|------------------------------------------------------------------|------------------------------------------------------------------------------------------------------------------------------------------------------------------------------------------------|-----------------------------------------------------------------------------------|-----------------------------------------------------|----------------------------------------------------------------------------------------------|
| Aydođdu M et al<br>2014<br>Turkey, Upper<br>middle income        | Wells score and pulmonary embolism rule<br>out criteria in preventing over<br>investigation of pulmonary embolism in<br>emergency departments<br>Tuberkuloz ve Toraks                          | Observational e.g. cohort<br>or cross-sectional studies<br>Quantitative (n= 108)  | Condition: CVD<br>Test: Imaging - CT & US           | Overuse of tests<br>Potential Solutions<br>Financial Impact: Yes                             |
| Bhattacharyya A et al<br>2012<br>India, Lower middle<br>income   | A Comparative Study of the Management<br>Decisions by IMNCI Algorithm and by<br>Pediatricians of a Teaching Hospital for the<br>Children Between 2 Months to 5 Years<br>Indian J Community Med | Observational e.g. cohort<br>or cross-sectional studies<br>Quantitative (n= 131)  | Condition: Infectious<br>Test: N/A                  | Overdiagnosis<br>Overdiagnosis or Overuse<br>of tests estimation<br>Financial Impact: No     |
| Bohara TP et al 2018<br>Nepal, Lower middle<br>income            | Appropriateness of Indications of Upper<br>Gastrointestinal Endoscopy and its<br>Association With Positive Finding<br>JNMA J Nepal Med Assoc                                                   | Observational e.g. cohort<br>or cross-sectional studies<br>Quantitative (n= 79)   | Condition: N/A<br>Test: Procedure - GI<br>Endoscopy | Overuse of tests<br>Overdiagnosis or Overuse<br>of tests estimation<br>Financial Impact: Yes |
| Borges A et al 2018<br>Colombia, Costa<br>Rica, Brazil, Ecuador, | Thyroid Cancer Incidences From Selected<br>South America Population-Based Cancer<br>Registries: An Age-Period-Cohort Study<br>J Glob Oncol                                                     | Observational e.g. cohort<br>or cross-sectional studies<br>Quantitative (n= 7889) | Condition: Cancer<br>Test: N/A                      | Overdiagnosis<br>Overdiagnosis or Overuse<br>of tests estimation<br>Financial Impact: No     |

|                                                               |                                                                                                                                                          |                                                                                |                                                               |                                                                                                                         |
|---------------------------------------------------------------|----------------------------------------------------------------------------------------------------------------------------------------------------------|--------------------------------------------------------------------------------|---------------------------------------------------------------|-------------------------------------------------------------------------------------------------------------------------|
| Bruxvoort K et al<br>2011<br>Tanzania, Lower<br>middle income | Over and under-use of artemisinin based combination therapy at public health facilities in three regions of Tanzania<br>Am J Trop Med Hyg                | Observational e.g. cohort or cross-sectional studies<br>Quantitative (n= 1779) | Condition: Infectious<br>Test: N/A                            | Overdiagnosis<br>Impact on further testing or treatment i.e. consequence of OD or Overuse of tests<br>Financial Impact: |
| Buendía JA et al<br>2020<br>Colombia, Upper<br>middle income  | A predictive model of inappropriate use of medical tests and medications in Bronchiolitis<br>Pan Afr Med J                                               | Observational e.g. cohort or cross-sectional studies<br>Quantitative (n= 1930) | Condition: Lung<br>Test: Pathology and Imaging                | Overuse of tests<br>Drivers and factors related to OD or overuse of tests<br>Financial Impact: Yes                      |
| Caliskan E et al 2004<br>Turkey, Upper<br>middle income       | A population-based risk factor scoring will decrease unnecessary testing for the diagnosis of gestational diabetes mellitus<br>Acta Obstet Gynecol Scand | Observational e.g. cohort or cross-sectional studies<br>Quantitative (n= 425)  | Condition: Diabetes<br>Test: N/A                              | Overdiagnosis<br>Potential Solutions<br>Financial Impact: Yes                                                           |
| Chan TH et al 2006<br>Malaysia, Upper<br>middle income        | Appropriateness of colonoscopy using the ASGE guidelines: experience in a large Asian hospital<br>Chin J Dig Dis                                         | Observational e.g. cohort or cross-sectional studies<br>Quantitative (n= 380)  | Condition: N/A<br>Test: Procedure - GI Endoscopy, colonoscopy | Overuse of tests<br>Overdiagnosis or Overuse of tests estimation<br>Financial Impact: No                                |
| Chandler CI et al<br>2008<br>Tanzania, Lower<br>middle income | Malaria overdiagnosis: is patient pressure the problem?<br>Health Policy Plan                                                                            | Observational e.g. cohort or cross-sectional studies<br>Qualitative (n= 669)   | Condition: Infectious<br>Test: Pathology                      | Overdiagnosis<br>Drivers and factors related to OD or overuse of tests<br>Financial Impact: No                          |

|                                                                |                                                                                                                                                                                    |                                                                                  |                                    |                                                                                                                                     |
|----------------------------------------------------------------|------------------------------------------------------------------------------------------------------------------------------------------------------------------------------------|----------------------------------------------------------------------------------|------------------------------------|-------------------------------------------------------------------------------------------------------------------------------------|
| Chandler CI et al<br>2014<br>Tanzania, Lower<br>middle income  | The development of effective behaviour<br>change interventions to support the use of<br>malaria rapid diagnostic tests by<br>Tanzanian clinicians<br>Implement Sci                 | Observational e.g. cohort<br>or cross-sectional studies<br>Qualitative (n= 231)  | Condition: Infectious<br>Test: N/A | Both<br>Potential Solutions<br>Financial Impact: No                                                                                 |
| Chandler CI et al<br>2008<br>Tanzania, Lower<br>middle income  | Guidelines and mindlines: why do clinical<br>staff over-diagnose malaria in Tanzania? A<br>qualitative study<br>Malar J                                                            | Observational e.g. cohort<br>or cross-sectional studies<br>Qualitative (n= 34)   | Condition: Infectious<br>Test: N/A | Both<br>Drivers and factors related<br>to OD or overuse of tests<br>Financial Impact: No                                            |
| Chipwaza B et al<br>2014<br>Tanzania, Lower<br>middle income   | Community knowledge and attitudes and<br>health workers' practices regarding non-<br>malaria febrile illnesses in eastern<br>Tanzania<br>PLoS Negl Trop Dis                        | Observational e.g. cohort<br>or cross-sectional studies<br>Qualitative (n= 107)  | Condition: Infectious<br>Test: N/A | Overdiagnosis<br>Drivers and factors related<br>to OD or overuse of tests<br>Financial Impact: No                                   |
| Cui Y et al 2021<br>China, Upper middle<br>income              | Trend dynamics of thyroid cancer<br>incidence among China and the U.S. adult<br>population from 1990 to 2017: a joinpoint<br>and age-period-cohort analysis<br>BMC Public Health   | Observational e.g. cohort<br>or cross-sectional studies<br>Quantitative (n= N/A) | Condition: Cancer<br>Test: N/A     | Overdiagnosis<br>Overdiagnosis or Overuse<br>of tests estimation<br>Financial Impact: No                                            |
| D'Acromont V et al<br>2011<br>Tanzania, Lower<br>middle income | Reduction of anti-malarial consumption<br>after rapid diagnostic tests<br>implementation in Dar es Salaam: a<br>before-after and cluster randomized<br>controlled study<br>Malar J | Interventional e.g.<br>randomised trial<br>Quantitative (n= N/A)                 | Condition: Infectious<br>Test: N/A | Overdiagnosis<br>Impact on further testing<br>or treatment i.e.<br>consequence of OD or<br>Overuse of tests<br>Financial Impact: No |

|                                                                                     |                                                                                                                                                                         |                                                                                 |                                                                  |                                                                                                                      |
|-------------------------------------------------------------------------------------|-------------------------------------------------------------------------------------------------------------------------------------------------------------------------|---------------------------------------------------------------------------------|------------------------------------------------------------------|----------------------------------------------------------------------------------------------------------------------|
| Dai S, Huang B, Zou Y, Guo J, Liu Z, Pi D, et al 2018<br>China, Upper middle income | The HEART score is useful to predict cardiovascular risks and reduces unnecessary cardiac imaging in low-risk patients with acute chest pain<br>Medicine (Baltimore)    | Observational e.g. cohort or cross-sectional studies<br>Quantitative (n= 244)   | Condition: CVD<br>Test: N/A                                      | Overuse of tests<br>Potential Solutions<br>Financial Impact: No                                                      |
| Dejsomritrutai W et al 2016<br>Thailand, Upper middle income                        | Impact of GLI-2012 spirometric references and lower limit of normal on prevalence of COPD in older urban Thai persons<br>Journal of the Medical Association of Thailand | Observational e.g. cohort or cross-sectional studies<br>Qualitative (n= 3094)   | Condition: Lung<br>Test: N/A                                     | Overdiagnosis<br>Overdiagnosis or Overuse of tests estimation<br>Financial Impact:                                   |
| Demir S et al 2016<br>Turkey, Upper middle income                                   | Unnecessary repeated total cholesterol tests in biochemistry laboratory<br>Biochemia Medica                                                                             | Observational e.g. cohort or cross-sectional studies<br>Quantitative (n= 86817) | Condition: N/A<br>Test: Pathology                                | Overuse of tests<br>Overdiagnosis or Overuse of tests estimation<br>Financial Impact: No                             |
| Esteban S et al 2017<br>Argentina, Upper middle income                              | Colonoscopy overuse in colorectal cancer screening and associated factors in Argentina: a retrospective cohort study<br>BMC Gastroenterol                               | Observational e.g. cohort or cross-sectional studies<br>Quantitative (n= 389)   | Condition: Cancer<br>Test: Procedure - GI Endoscopy, colonoscopy | Overuse of tests<br>Overdiagnosis or Overuse of tests estimation<br>Financial Impact: No                             |
| Faust C et al 2015<br>Senegal, Lower middle income                                  | Assessing drivers of full adoption of test and treat policy for malaria in Senegal<br>Am J Trop Med Hyg                                                                 | Observational e.g. cohort or cross-sectional studies<br>Quantitative (n= 28527) | Condition: Infectious<br>Test: N/A                               | Both<br>Impact on further testing or treatment i.e. consequence of OD or<br>Overuse of tests<br>Financial Impact: No |

|                                                                                  |                                                                                                                                                                              |                                                                                    |                                                       |                                                                                                                                         |
|----------------------------------------------------------------------------------|------------------------------------------------------------------------------------------------------------------------------------------------------------------------------|------------------------------------------------------------------------------------|-------------------------------------------------------|-----------------------------------------------------------------------------------------------------------------------------------------|
| Fehintola FA et al<br>2010<br>Nigeria , Lower<br>middle income                   | Malaria: passive case detection and<br>healthcare providers' choices of<br>chemotherapy<br>Afr J Med Med Sci                                                                 | Observational e.g. cohort<br>or cross-sectional studies<br>Quantitative (n= 630)   | Condition: Infectious<br>Test: N/A                    | Overdiagnosis<br>Overdiagnosis or Overuse<br>of tests estimation<br>Financial Impact: No                                                |
| Floriani ID,<br>Borgmann AV,<br>Barreto MR, Ribeiro<br>ER 2022<br>China, Turkey, | Exposure of pediatric emergency patients<br>to imaging exams, nowadays and in times<br>of covid-19: an integrative review<br>Rev Paul Pediatr (Ed Port, Online)              | Review<br>Qualitative (n= N/A)                                                     | Condition: Trauma<br>Test: Imaging - CT, X-ray,<br>US | Overuse of tests<br>Impact on further testing<br>or treatment i.e.<br>consequence of OD or<br>Overuse of tests<br>Financial Impact: Yes |
| Ganiele MdIN et al<br>2016<br>Argentina, Upper<br>middle income                  | Excesivo rastreo de osteoporosis en<br>mujeres menores de 65 años: estudio de<br>corte transversal<br>Salud colect                                                           | Observational e.g. cohort<br>or cross-sectional studies<br>Quantitative (n= 4310)  | Condition: Diabetes<br>Test: Imaging                  | Overdiagnosis<br>Overdiagnosis or Overuse<br>of tests estimation<br>Financial Impact: No                                                |
| Genç O et al 2014<br>Turkey, Upper<br>middle income                              | [Inappropriate use of serological tests for<br>hepatitis B virus in Evliya Celebi Education<br>and Research Hospital of Dumlupinar<br>University, Kütahya]<br>Mikrobiyol Bul | Observational e.g. cohort<br>or cross-sectional studies<br>Qualitative (n= 179640) | Condition: Infectious<br>Test: Pathology - Hepatitis  | Overuse of tests<br>Overdiagnosis or Overuse<br>of tests estimation<br>Financial Impact: Y                                              |



|                                                                                                                                             |                                                                                                                                                             |                                                                               |                                        |                                                                                          |
|---------------------------------------------------------------------------------------------------------------------------------------------|-------------------------------------------------------------------------------------------------------------------------------------------------------------|-------------------------------------------------------------------------------|----------------------------------------|------------------------------------------------------------------------------------------|
| Georgakis MK et al 2018<br>11 countries<br>(Belarus, Croatia, Cyprus, Greece, Malta, Poland, Portugal, Romania, Slovenia, Turkey, Ukraine), | Neuroblastoma among children in Southern and Eastern European cancer registries: Variations in incidence and temporal trends compared to US<br>Int J Cancer | Review<br>Quantitative (n= 1859)                                              | Condition: Cancer<br>Test: N/A         | Overdiagnosis<br>Overdiagnosis or Overuse of tests estimation<br>Financial Impact:       |
| Gómez-Landeros O et al 2020<br>Mexico, Upper middle income                                                                                  | [Radio-diagnostic congruence improvement in a first-level unit]<br>Rev Med Inst Mex Seguro Soc                                                              | Interventional e.g. randomised trial<br>Quantitative (n= N/A)                 | Condition: N/A<br>Test: Imaging        | Overuse of tests<br>Overdiagnosis or Overuse of tests estimation<br>Financial Impact: No |
| Gonzaga MA, Kiguli-Malwadde E, Businge F, Byanyima RK 2010<br>Uganda, Low income                                                            | Utilisation of obstetric sonography at a peri-urban health centre in Uganda<br>Pan Afr Med J                                                                | Observational e.g. cohort or cross-sectional studies<br>Quantitative (n= 105) | Condition: N/A<br>Test: Imaging - US   | Overuse of tests<br>Overdiagnosis or Overuse of tests estimation<br>Financial Impact: No |
| Goonetilleke MPB et al 2013<br>Sri Lanka, Lower middle income                                                                               | An audit on the outcome of children referred to the paediatric cardiology unit with a previous echocardiographic diagnosis of mitral valve prolapse         | Observational e.g. cohort or cross-sectional studies<br>Qualitative (n= 141)  | Condition: CVD<br>Test: Imaging - Echo | Overdiagnosis<br>Overdiagnosis or Overuse of tests estimation<br>Financial Impact:       |
| Günəsti S et al 2010<br>Turkey, Upper middle income                                                                                         | Evaluation of a guideline for etiological diagnosis of chronic urticaria<br>Turkiye Klinikleri Journal of Medical Sciences                                  | Observational e.g. cohort or cross-sectional studies<br>Quantitative (n= 903) | Condition: Others<br>Test: N/A         | Overuse of tests<br>Overdiagnosis or Overuse of tests estimation<br>Financial Impact: No |

|                                                         |                                                                                                                                                                              |                                                                                |                                    |                                                                                                                             |
|---------------------------------------------------------|------------------------------------------------------------------------------------------------------------------------------------------------------------------------------|--------------------------------------------------------------------------------|------------------------------------|-----------------------------------------------------------------------------------------------------------------------------|
| Hajeer MH et al 2018<br>Jordan, Upper middle income     | The rising trend in papillary thyroid carcinoma. True increase or over diagnosis?<br>Saudi Med J                                                                             | Review<br>Quantitative (n= 313)                                                | Condition: Cancer<br>Test: N/A     | Overdiagnosis<br>Overdiagnosis or Overuse of tests estimation<br>Financial Impact:                                          |
| Hamer DH et al 2007<br>Zambia, Lower middle income      | Improved diagnostic testing and malaria treatment practices in Zambia<br>JAMA                                                                                                | Observational e.g. cohort or cross-sectional studies<br>Quantitative (n= 1717) | Condition: Infectious<br>Test: N/A | Both<br>Impact on further testing or treatment i.e. consequence of OD or Overuse of tests<br>Financial Impact: No           |
| Harchut K et al 2013<br>Tanzania, Lower middle income   | Over-diagnosis of malaria by microscopy in the Kilombero Valley, Southern Tanzania: an evaluation of the utility and cost-effectiveness of rapid diagnostic tests<br>Malar J | Observational e.g. cohort or cross-sectional studies<br>Quantitative (n= 9575) | Condition: Infectious<br>Test: N/A | Overdiagnosis<br>Overdiagnosis or Overuse of tests estimation<br>Financial Impact: Yes                                      |
| Harutyunyan V 2010<br>Tanzania, Lower middle income     | Quality assurance of malaria rapid diagnostic tests (RDT) and its implication for clinical management of malaria<br>Am J Trop Med Hyg                                        | Diagnostic Test Accuracy<br>Mixed (n= 513)                                     | Condition: Infectious<br>Test: N/A | Overdiagnosis<br>Potential Solutions<br>Financial Impact:                                                                   |
| Hawkes S et al 1999<br>Bangladesh , Lower middle income | Reproductive-tract infections in women in low-income, low-prevalence situations: assessment of syndromic management in Matlab, Bangladesh<br>Lancet                          | Observational e.g. cohort or cross-sectional studies<br>Quantitative (n= 465)  | Condition: Infectious<br>Test: N/A | Overdiagnosis<br>Impact on further testing or treatment i.e. consequence of OD or Overuse of tests<br>Financial Impact: Yes |

|                                                                                                                                                                                                                                                                                                            |                                                                                                                                                                              |                                                                              |                                                 |                                                                                                                            |
|------------------------------------------------------------------------------------------------------------------------------------------------------------------------------------------------------------------------------------------------------------------------------------------------------------|------------------------------------------------------------------------------------------------------------------------------------------------------------------------------|------------------------------------------------------------------------------|-------------------------------------------------|----------------------------------------------------------------------------------------------------------------------------|
| He AJ 2014<br>China, Upper middle income                                                                                                                                                                                                                                                                   | The doctor-patient relationship, defensive medicine and overprescription in Chinese public hospitals: evidence from a cross-sectional survey in Shenzhen city<br>Soc Sci Med | Observational e.g. cohort or cross-sectional studies<br>Qualitative (n= 504) | Condition: N/A<br>Test: N/A                     | Overuse of tests<br>Drivers and factors related to OD or overuse of tests<br>Financial Impact: No                          |
| Henao-Villada R et al 2016<br>Colombia, Upper middle income                                                                                                                                                                                                                                                | Impact of the implementation of an evidence-based guideline on diagnostic testing, management, and clinical outcomes for infants with bronchiolitis<br>Ther Adv Respir Dis   | Interventional e.g. randomised trial<br>Quantitative (n= 1365)               | Condition: Lung<br>Test: N/A                    | Overuse of tests<br>Impact on further testing or treatment i.e. consequence of OD or Overuse of tests<br>Financial Impact: |
| Ho T, Cusack RP, Chaudhary N, Satia I, Kurmi OP 2019<br>Africa (Uganda, Nigeria, Malawi, Cameroon); Central and South America (Peru, Mexico, Brazil, Colombia); South-East Asia (China, Vietnam, Malaysia, Thailand, Indonesia, Philippines, Taiwan<br>*Note there are also HIC reported from SEA region), | Under- and over-diagnosis of COPD: a global perspective<br>Breathe (Sheff)                                                                                                   | Review<br>Unclear (n= N/A)                                                   | Condition: Lung<br>Test: Procedure - Spirometry | Overdiagnosis<br>Overdiagnosis or Overuse of tests estimation<br>Financial Impact: No                                      |

|                                                          |                                                                                                                                                                                                  |                                                                                  |                                    |                                                                                                                             |
|----------------------------------------------------------|--------------------------------------------------------------------------------------------------------------------------------------------------------------------------------------------------|----------------------------------------------------------------------------------|------------------------------------|-----------------------------------------------------------------------------------------------------------------------------|
| Hu XF et al 2017<br>China, Upper middle income           | [The impact of broadened diagnostic criteria on the prevalence of hypertension, hyperlipidemia and diabetes mellitus in China]<br>Zhonghua Yu Fang Yi Xue Za Zhi                                 | Observational e.g. cohort or cross-sectional studies<br>Quantitative (n= 154067) | Condition: CVD<br>Test: N/A        | Overdiagnosis<br>Impact of expanding disease definitions and thresholds<br>Financial Impact: Yes                            |
| Hume JC et al 2008<br>Mozambique, Low income             | Household cost of malaria overdiagnosis in rural Mozambique<br>Malar J                                                                                                                           | Observational e.g. cohort or cross-sectional studies<br>Quantitative (n= 535)    | Condition: Infectious<br>Test: N/A | Overdiagnosis<br>Impact on further testing or treatment i.e. consequence of OD or Overuse of tests<br>Financial Impact: Yes |
| Ishengoma DS et al 2011<br>Tanzania, Lower middle income | Declining burden of malaria in a rural community in Muheza district northeastern Tanzania over a period of 18 years (1992-2010) and its impact on antimalarial prescription<br>Am J Trop Med Hyg | Observational e.g. cohort or cross-sectional studies<br>Quantitative (n= 5755)   | Condition: Infectious<br>Test: N/A | Overdiagnosis<br>Impact on further testing or treatment i.e. consequence of OD or Overuse of tests<br>Financial Impact: No  |

|                                                                 |                                                                                                                                                                                                    |                                                                                    |                                    |                                                                                                                            |
|-----------------------------------------------------------------|----------------------------------------------------------------------------------------------------------------------------------------------------------------------------------------------------|------------------------------------------------------------------------------------|------------------------------------|----------------------------------------------------------------------------------------------------------------------------|
| Ishengoma DS et al<br>2011<br>Tanzania, Lower<br>middle income  | Accuracy of malaria rapid diagnostic tests<br>in community studies and their impact on<br>treatment of malaria in an area with<br>declining malaria burden in north-eastern<br>Tanzania<br>Malar J | Diagnostic Test Accuracy<br>Quantitative (n= 23793)                                | Condition: Infectious<br>Test: N/A | Both<br>Impact on further testing<br>or treatment i.e.<br>consequence of OD or<br>Overuse of tests<br>Financial Impact: No |
| Janovsky C et al<br>2018<br>Brazil, Upper middle<br>income      | Thyroid cancer burden and economic<br>impact on the Brazilian public health<br>system<br>Arch Endocrinol Metab                                                                                     | Observational e.g. cohort<br>or cross-sectional studies<br>Quantitative (n= N/A)   | Condition: Cancer<br>Test: N/A     | Overdiagnosis<br>Overdiagnosis or Overuse<br>of tests estimation<br>Financial Impact: Yes                                  |
| Javed H et al 2019<br>Pakistan, Lower<br>middle income          | Increased trend of unnecessary use of<br>radiological diagnostic modalities in<br>Pakistan: radiologists perspective<br>Int J Qual Health Care                                                     | Observational e.g. cohort<br>or cross-sectional studies<br>Qualitative (n= 105)    | Condition: N/A<br>Test: Imaging    | Overuse of tests<br>Drivers and factors related<br>to OD or overuse of tests<br>Financial Impact: No                       |
| Kahama-Maró J et al<br>2011<br>Tanzania, Lower<br>middle income | Low quality of routine microscopy for<br>malaria at different levels of the health<br>system in Dar es Salaam<br>Malar J                                                                           | Observational e.g. cohort<br>or cross-sectional studies<br>Quantitative (n= 20386) | Condition: Infectious<br>Test: N/A | Overdiagnosis<br>Potential Solutions<br>Financial Impact: No                                                               |

|                                                                         |                                                                                                                                                                       |                                                                                  |                                                  |                                                                                             |
|-------------------------------------------------------------------------|-----------------------------------------------------------------------------------------------------------------------------------------------------------------------|----------------------------------------------------------------------------------|--------------------------------------------------|---------------------------------------------------------------------------------------------|
| Kamolratanapiboon K et al 2019<br>Thailand, Upper middle income         | Inappropriate use of D-dimer and impact on the test characteristics for deep vein thrombosis exclusion<br>Scand J Clin Lab Invest                                     | Observational e.g. cohort or cross-sectional studies<br>quantitative (n= 300)    | Condition: CVD<br>Test: Pathology - D-dimer      | Overuse of tests<br>Overdiagnosis or Overuse of tests estimation<br>Financial Impact:       |
| Kaur S, Singh V, Dutta AK, Chandra J 2011<br>India, Lower middle income | Validation of IMNCI algorithm for young infants (0-2 months) in India<br>Indian J Pediatr                                                                             | Observational e.g. cohort or cross-sectional studies<br>Quantitative (n= 419)    | Condition: Infectious<br>Test: N/A               | Overdiagnosis<br>Overdiagnosis or Overuse of tests estimation<br>Financial Impact:          |
| Kavosi Z et al 2021<br>Iran, Upper middle income                        | The inappropriateness of brain MRI prescriptions: a study from Iran<br>Cost Eff Resour Alloc                                                                          | Observational e.g. cohort or cross-sectional studies<br>Qualitative (n= 385)     | Condition: N/A<br>Test: Imaging - MRI            | Overuse of tests<br>Overdiagnosis or Overuse of tests estimation<br>Financial Impact: Y     |
| Kılıncarslan MG et al 2019<br>Turkey, Upper middle income               | Prevalence and associated factors of inappropriate repeat test<br>Postgrad Med J                                                                                      | Observational e.g. cohort or cross-sectional studies<br>Quantitative (n= 673794) | Condition: N/A<br>Test: Pathology                | Overuse of tests<br>Overdiagnosis or Overuse of tests estimation<br>Financial Impact: Yes   |
| Kumar N et al 2011<br>Kenya, Lower middle income                        | Educational needs and causes of false diagnosis of atypical squamous cells of unknown significance at a university hospital<br>African Journal of Reproductive Health | Observational e.g. cohort or cross-sectional studies<br>Unclear (n= 6500)        | Condition: Cancer<br>Test: Procedure - Pap smear | Overdiagnosis<br>Drivers and factors related to OD or overuse of tests<br>Financial Impact: |

|                                                    |                                                                                                                                                            |                                                                                 |                                                  |                                                                                                                   |
|----------------------------------------------------|------------------------------------------------------------------------------------------------------------------------------------------------------------|---------------------------------------------------------------------------------|--------------------------------------------------|-------------------------------------------------------------------------------------------------------------------|
| Lee WS et al 2013<br>Malaysia, Upper middle income | Appropriateness, endoscopic findings and contributive yield of pediatric gastrointestinal endoscopy<br>World J Gastroenterol                               | Observational e.g. cohort or cross-sectional studies<br>Quantitative (n= 301)   | Condition: N/A<br>Test: Procedure - GI Endoscopy | Overuse of tests<br>Overdiagnosis or Overuse of tests estimation<br>Financial Impact: No                          |
| Leslie T et al 2017<br>Afghanistan, Low income     | Use of malaria rapid diagnostic tests by community health workers in Afghanistan: cluster randomised trial<br>BMC Med                                      | Interventional e.g. randomised trial<br>Quantitative (n= 2400)                  | Condition: Infectious<br>Test: N/A               | Both<br>Impact on further testing or treatment i.e. consequence of OD or Overuse of tests<br>Financial Impact: No |
| Leslie T et al 2012<br>Afghanistan, Low income     | Overdiagnosis and mistreatment of malaria among febrile patients at primary healthcare level in Afghanistan: observational study<br>BMJ                    | Observational e.g. cohort or cross-sectional studies<br>Quantitative (n= 2381)  | Condition: Infectious<br>Test: N/A               | Both<br>Impact on further testing or treatment i.e. consequence of OD or Overuse of tests<br>Financial Impact: No |
| Li M et al 2021<br>China, Upper middle income      | Mapping overdiagnosis of thyroid cancer in China<br>Lancet Diabetes Endocrinol                                                                             | Observational e.g. cohort or cross-sectional studies<br>Quantitative (n= 27842) | Condition: Cancer<br>Test: N/A                   | Overdiagnosis<br>Overdiagnosis or Overuse of tests estimation<br>Financial Impact: No                             |
| Li R et al 2020<br>China, Upper middle income      | A rapidly increasing trend of thyroid cancer incidence in selected East Asian countries: Joinpoint regression and age-period-cohort analyses<br>Gland Surg | Observational e.g. cohort or cross-sectional studies<br>Quantitative (n= N/A)   | Condition: Cancer<br>Test: N/A                   | Overdiagnosis<br>Overdiagnosis or Overuse of tests estimation<br>Financial Impact:                                |

|                                                                                                                                                                                                                                                   |                                                                                                                       |                                                                                  |                                    |                                                                                                |
|---------------------------------------------------------------------------------------------------------------------------------------------------------------------------------------------------------------------------------------------------|-----------------------------------------------------------------------------------------------------------------------|----------------------------------------------------------------------------------|------------------------------------|------------------------------------------------------------------------------------------------|
| Lortet-Tieulent J et al 2019<br>Ecuador, Thailand, Algeria, Argentina, Brazil, China, India, Turkey, Costa Rica, Belarus, Colombia, Peru, Uruguay, Vietnam, Philippines, Chile, Ukraine, Russia, Jordan, Zimbabwe, Kenya, Malaysia, Iran, Uganda, | Thyroid cancer "epidemic" also occurs in low- and middle-income countries<br>Int J Cancer                             | Observational e.g. cohort or cross-sectional studies<br>Quantitative (n= 599851) | Condition: Cancer<br>Test: N/A     | Overdiagnosis<br>Overdiagnosis or Overuse of tests estimation<br>Financial Impact: No          |
| M F et al 2005<br>Iran, Upper middle income                                                                                                                                                                                                       | [Identification and prediction of overdiagnosis of dystocia]                                                          | Observational e.g. cohort or cross-sectional studies<br>Qualitative (n= 248)     | Condition: Trauma<br>Test: N/A     | Overdiagnosis<br>Drivers and factors related to OD or overuse of tests<br>Financial Impact: No |
| Mamova A et al 2017<br>Kenya, Lower middle income                                                                                                                                                                                                 | Misdiagnosing of malaria as RTI decreased after introduction of RDTs in rural areas of Kenya<br>Neuro Endocrinol Lett | Observational e.g. cohort or cross-sectional studies<br>Quantitative (n= N/A)    | Condition: Infectious<br>Test: N/A | Overdiagnosis<br>Drivers and factors related to OD or overuse of tests<br>Financial Impact:    |
| Manguin S et al 2017<br>Angola, Lower middle income                                                                                                                                                                                               | Malaria overdiagnosis and subsequent overconsumption of antimalarial drugs in Angola: Consequences and effects on     | Observational e.g. cohort or cross-sectional studies<br>Quantitative (n= 724)    | Condition: Infectious<br>Test: N/A | Both<br>Impact on further testing or treatment i.e. consequence of OD or                       |



|                                                        | human health<br>Acta Trop                                                                                                                                                                         |                                                                                |                                    | Overuse of tests<br>Financial Impact: No                                                                                   |
|--------------------------------------------------------|---------------------------------------------------------------------------------------------------------------------------------------------------------------------------------------------------|--------------------------------------------------------------------------------|------------------------------------|----------------------------------------------------------------------------------------------------------------------------|
| Masanja IM et al 2012<br>Tanzania, Lower middle income | Increased use of malaria rapid diagnostic tests improves targeting of anti-malarial treatment in rural Tanzania: implications for nationwide rollout of malaria rapid diagnostic tests<br>Malar J | Observational e.g. cohort or cross-sectional studies<br>Quantitative (n= 1471) | Condition: Infectious<br>Test: N/a | Both<br>Impact on further testing or treatment i.e. consequence of OD or Overuse of tests<br>Financial Impact:             |
| Masika PM et al 2006<br>Tanzania, Lower middle income  | Over-diagnosis of malaria is not a lost cause<br>Malar J                                                                                                                                          | Interventional e.g. randomised trial<br>Quantitative (n= N/A)                  | Condition: Infectious<br>Test: N/A | Overdiagnosis<br>Impact on further testing or treatment i.e. consequence of OD or Overuse of tests<br>Financial Impact: No |
| Mathew IE et al 2017<br>India, Lower middle income     | Rising Thyroid Cancer Incidence in Southern India: An Epidemic of Overdiagnosis?<br>J Endocr Soc                                                                                                  | Review<br>Quantitative (n= N/A)                                                | Condition: Cancer<br>Test: N/A     | Overdiagnosis<br>Overdiagnosis or Overuse of tests estimation<br>Financial Impact: No                                      |
| Maung K et al 2015<br>Malaysia, Upper middle income    | Assessment of documentation of DSM-IV-TR Criteria A for diagnosis of schizophrenia in psychiatric unit, tertiary hospital, Malaysia<br>Clin Ter                                                   | Observational e.g. cohort or cross-sectional studies<br>quantitative (n= 107)  | Condition: Mental<br>Test: N/A     | Overdiagnosis<br>Impact on further testing or treatment i.e. consequence of OD or Overuse of tests<br>Financial Impact:    |

|                                                                |                                                                                                                                                                            |                                                                                 |                                    |                                                                                                                            |
|----------------------------------------------------------------|----------------------------------------------------------------------------------------------------------------------------------------------------------------------------|---------------------------------------------------------------------------------|------------------------------------|----------------------------------------------------------------------------------------------------------------------------|
| Mbonye AK et al<br>2010<br>Uganda , Low<br>income              | Symptom-based diagnosis of malaria and its implication on antimalarial drug use in pregnancy in Central Uganda: results from a community trial<br>Int J Adolesc Med Health | Interventional e.g.<br>randomised trial<br>Quantitative (n= 2785)               | Condition: Infectious<br>Test: N/A | Overdiagnosis<br>Overdiagnosis or Overuse<br>of tests estimation<br>Financial Impact: No                                   |
| Mbonye AK et al<br>2015<br>Uganda, Low income                  | A Cluster Randomised Trial Introducing Rapid Diagnostic Tests into Registered Drug Shops in Uganda: Impact on Appropriate Treatment of Malaria<br>PLoS One                 | Interventional e.g.<br>randomised trial<br>Quantitative (n= 15517)              | Condition: Infectious<br>Test: N/A | Both<br>Impact on further testing<br>or treatment i.e.<br>consequence of OD or<br>Overuse of tests<br>Financial Impact: No |
| McPherson K et al<br>2018<br>Palestine, Lower<br>middle income | The overestimation and the inappropriate promotion of the benefits of mammographic screening in breast cancer research and interventions in the Gaza Strip<br>Lancet       | Observational e.g. cohort<br>or cross-sectional studies<br>Qualitative (n= N/A) | Condition: Cancer<br>Test: N/A     | Overdiagnosis<br>Drivers and factors related<br>to OD or overuse of tests<br>Financial Impact: No                          |
| Mendonça DR et al<br>2020<br>Brazil, Upper middle<br>income    | Implementation of the Choosing Wisely Campaign at a Medical Clinic Internship<br>Rev bras educ méd                                                                         | Interventional e.g.<br>randomised trial<br>quantitative (n= 208)                | Condition: N/A<br>Test: N/A        | Overuse of tests<br>Overdiagnosis or Overuse<br>of tests estimation<br>Financial Impact:                                   |

|                                                      |                                                                                                                                                           |                                                                               |                                                               |                                                                                                                             |
|------------------------------------------------------|-----------------------------------------------------------------------------------------------------------------------------------------------------------|-------------------------------------------------------------------------------|---------------------------------------------------------------|-----------------------------------------------------------------------------------------------------------------------------|
| Mianji F et al 2020<br>Iran, Upper middle income     | The Globalization of Biological Psychiatry and the Rise of Bipolar Spectrum Disorder in Iran<br>Cult Med Psychiatry                                       | Observational e.g. cohort or cross-sectional studies<br>Qualitative (n= 25)   | Condition: Mental<br>Test: N/A                                | Both<br>Drivers and factors related to OD or overuse of tests<br>Financial Impact: No                                       |
| Mosha JF et al 2010<br>Tanzania, Lower middle income | Cost implications of improving malaria diagnosis: findings from north-eastern Tanzania<br>PLoS One                                                        | Observational e.g. cohort or cross-sectional studies<br>Quantitative (n= N/A) | Condition: Infectious<br>Test: N/A                            | Overdiagnosis<br>Impact on further testing or treatment i.e. consequence of OD or Overuse of tests<br>Financial Impact: Yes |
| Mudawi HM et al 2012<br>Sudan, Low income            | American Society for Gastrointestinal Endoscopy guidelines for appropriate use of colonoscopy: are they suitable for African patients?<br>Trop Doct       | Observational e.g. cohort or cross-sectional studies<br>Quantitative (n= 311) | Condition: N/A<br>Test: Procedure - GI Endoscopy, colonoscopy | Overuse of tests<br>Overdiagnosis or Overuse of tests estimation<br>Financial Impact: No                                    |
| Muwonge R et al 2014<br>India, Lower middle income   | Evaluation of cytology and visual triage of human papillomavirus-positive women in cervical cancer prevention in India<br>International Journal of Cancer | Interventional e.g. randomised trial<br>Quantitative (n= 42768)               | Condition: Cancer<br>Test: N/A                                | Both<br>Potential Solutions<br>Financial Impact: No                                                                         |

|                                                                |                                                                                                                                                                                    |                                                                                |                                                        |                                                                                                                            |
|----------------------------------------------------------------|------------------------------------------------------------------------------------------------------------------------------------------------------------------------------------|--------------------------------------------------------------------------------|--------------------------------------------------------|----------------------------------------------------------------------------------------------------------------------------|
| Mwanziva C et al 2011<br>Tanzania, Lower middle income         | Defining malaria burden from morbidity and mortality records, self treatment practices and serological data in Magugu, Babati District, northern Tanzania<br>Tanzan J Health Res   | Observational e.g. cohort or cross-sectional studies<br>Quantitative (n= 470)  | Condition: Infectious<br>Test: N/A                     | Overdiagnosis<br>Impact on further testing or treatment i.e. consequence of OD or Overuse of tests<br>Financial Impact: No |
| Na R et al 2017<br>China, Upper middle income                  | Prostate health index significantly reduced unnecessary prostate biopsies in patients with PSA 2-10 ng/mL and PSA >10 ng/mL: Results from a Multicenter Study in China<br>Prostate | Observational e.g. cohort or cross-sectional studies<br>Quantitative (n= 1538) | Condition: Cancer<br>Test: Procedure - Prostate biopsy | Overuse of tests<br>Overdiagnosis or Overuse of tests estimation<br>Financial Impact: No                                   |
| Nankabirwa J et al 2009<br>Uganda, Low income                  | Malaria misdiagnosis in Uganda-- implications for policy change<br>Malar J                                                                                                         | Observational e.g. cohort or cross-sectional studies<br>Quantitative (n= 1763) | Condition: Infectious<br>Test: N/A                     | Both<br>Impact on further testing or treatment i.e. consequence of OD or Overuse of tests<br>Financial Impact: No          |
| Nascimento-Júnior VP et al 2021<br>Brazil, Upper middle income | Inappropriate requests for tumor markers in patients aged 50 years and older: lessons not learned<br>Geriatr, Gerontol Aging (Impr)                                                | Observational e.g. cohort or cross-sectional studies<br>Quantitative (n= 1112) | Condition: N/A<br>Test: Pathology - Tumor marker       | Overuse of tests<br>Overdiagnosis or Overuse of tests estimation<br>Financial Impact: Yes                                  |
| Nguyen MH et al 2009<br>Vietnam, Lower middle income           | Reproductive tract infections in northern Vietnam: health providers' diagnostic dilemmas<br>Women Health                                                                           | Observational e.g. cohort or cross-sectional studies<br>Mixed (n= 748)         | Condition: Infectious<br>Test: N/A                     | Overdiagnosis<br>Drivers and factors related to OD or overuse of tests<br>Financial Impact: No                             |

|                                                         |                                                                                                                                                                                                                       |                                                                                |                                          |                                                                                                                                                                                                                           |
|---------------------------------------------------------|-----------------------------------------------------------------------------------------------------------------------------------------------------------------------------------------------------------------------|--------------------------------------------------------------------------------|------------------------------------------|---------------------------------------------------------------------------------------------------------------------------------------------------------------------------------------------------------------------------|
| Niu XK et al 2017<br>China, Upper middle income         | Developing a nomogram based on multiparametric magnetic resonance imaging for forecasting high-grade prostate cancer to reduce unnecessary biopsies within the prostate-specific antigen gray zone<br>BMC Med Imaging | Observational e.g. cohort or cross-sectional studies<br>quantitative (n= 151)  | Condition: Cancer<br>Test: Imaging - MRI | Overdiagnosis<br>Impact of expanding disease definitions and thresholds<br>Financial Impact:                                                                                                                              |
| Nomhwange TI et al 2009<br>Nigeria, Lower middle income | Diagnosis of malaria in children's outpatient departments in Abuja, Nigeria<br>Trop Doct                                                                                                                              | Observational e.g. cohort or cross-sectional studies<br>Quantitative (n= 1000) | Condition: Infectious<br>Test: N/A       | Overdiagnosis<br>Impact on further testing or treatment i.e. consequence of OD or Overuse of tests<br>Financial Impact: No                                                                                                |
| Nsutebu EF et al 2002<br>Cameroon, Lower middle income  | The increase in occurrence of typhoid fever in Cameroon: overdiagnosis due to misuse of the Widal test?<br>Trans R Soc Trop Med Hyg                                                                                   | Observational e.g. cohort or cross-sectional studies<br>Qualitative (n= 84)    | Condition: Infectious<br>Test: Imaging   | Overdiagnosis<br>Drivers and factors related to OD or overuse of tests<br>Financial Impact:<br>Misdiagnosis of typhoid fever leads to unnecessary expenditure and exposure of patients to the side-effects of antibiotics |
| Olcay A et al 2017<br>Turkey, Upper middle income       | The opinion of Turkish cardiologists on current malpractice system and an alternative patient compensation system proposal: PCS study group<br>Turk Kardiyol Dern Ars                                                 | Observational e.g. cohort or cross-sectional studies<br>Qualitative (n= 253)   | Condition: N/A<br>Test: unclear          | Overuse of tests<br>Drivers and factors related to OD or overuse of tests<br>Financial Impact:                                                                                                                            |

|                                                         |                                                                                                                                                      |                                                                                 |                                                      |                                                                                                                    |
|---------------------------------------------------------|------------------------------------------------------------------------------------------------------------------------------------------------------|---------------------------------------------------------------------------------|------------------------------------------------------|--------------------------------------------------------------------------------------------------------------------|
| Osei-Kwakye K et al 2013<br>Ghana, Lower middle income  | The benefits or otherwise of managing malaria cases with or without laboratory diagnosis: the experience in a district hospital in Ghana<br>PLoS One | Observational e.g. cohort or cross-sectional studies<br>Quantitative (n= 936)   | Condition: Infectious<br>Test: N/A                   | Both<br>Impact on further testing or treatment i.e. consequence of OD or Overuse of tests<br>Financial Impact: Yes |
| Ozbek OA et al 2004<br>Turkey, Upper middle income      | Application of hepatitis serology testing algorithms to assess inappropriate laboratory utilization<br>J Eval Clin Pract                             | Observational e.g. cohort or cross-sectional studies<br>Quantitative (n= 3341)  | Condition: Infectious<br>Test: Pathology - Hepatitis | Overuse of tests<br>Overdiagnosis or Overuse of tests estimation<br>Financial Impact: No                           |
| Ozbek OA et al 2010<br>Turkey, Upper middle income      | [Inappropriately ordered tests from hepatitis B vaccinated subjects]<br>Mikrobiyol Bul                                                               | Observational e.g. cohort or cross-sectional studies<br>Quantitative (n= 88174) | Condition: Infectious<br>Test: Pathology - Hepatitis | Overuse of tests<br>Overdiagnosis or Overuse of tests estimation<br>Financial Impact: Yes                          |
| Panato C et al 2020<br>India, Lower middle income       | Thyroid Cancer Incidence in India Between 2006 and 2014 and Impact of Overdiagnosis<br>J Clin Endocrinol Metab                                       | Observational e.g. cohort or cross-sectional studies<br>Quantitative (n= N/A)   | Condition: Cancer<br>Test: N/A                       | Overdiagnosis<br>Overdiagnosis or Overuse of tests estimation<br>Financial Impact: No                              |
| Pema AK et al 2018<br>South Africa, Upper middle income | Demand management by electronic gatekeeping of test requests does not influence requesting behaviour or save costs dramatically<br>Ann Clin Biochem  | Observational e.g. cohort or cross-sectional studies<br>Quantitative (n= N/A)   | Condition: N/A<br>Test: Pathology                    | Overuse of tests<br>Drivers and factors related to OD or overuse of tests<br>Financial Impact: yes                 |

|                                                             |                                                                                                                                                                                                                         |                                                                                   |                                    |                                                                                                                                     |
|-------------------------------------------------------------|-------------------------------------------------------------------------------------------------------------------------------------------------------------------------------------------------------------------------|-----------------------------------------------------------------------------------|------------------------------------|-------------------------------------------------------------------------------------------------------------------------------------|
| Pezeshki MZ et al<br>2020<br>Iran, Upper middle<br>income   | Medical Overuse in the Iranian Healthcare System: A Systematic Scoping Review and Practical Recommendations for Decreasing Medical Overuse During Unexpected COVID-19 Pandemic Opportunity<br>Risk Manag Healthc Policy | Review<br>Mixed (n= N/A)                                                          | Condition: N/A<br>Test: N/A        | Overuse of tests<br>Overdiagnosis or Overuse<br>of tests estimation<br>Financial Impact: No                                         |
| Pizzanelli M et al<br>2016<br>Latin America ,               | Prevención Cuaternaria: Ética Médica, Evaluación y Eficiencia en los Sistemas de Salud<br>Rev bras med fam comunidade                                                                                                   | Review<br>Qualitative (n= N/A)                                                    | Condition: N/A<br>Test: N/A        | Both<br>Potential Solutions<br>Financial Impact: No                                                                                 |
| Rehmani R et al<br>1999<br>Pakistan, Lower<br>middle income | Analysis of blood tests in the emergency department of a tertiary care hospital<br>Postgrad Med J                                                                                                                       | Observational e.g. cohort<br>or cross-sectional studies<br>Quantitative (n= 6401) | Condition: N/A<br>Test: Pathology  | Overuse of tests<br>Overdiagnosis or Overuse<br>of tests estimation<br>Financial Impact: No                                         |
| Reyburn H et al<br>2007<br>Tanzania, Lower<br>middle income | Rapid diagnostic tests compared with malaria microscopy for guiding outpatient treatment of febrile illness in Tanzania: randomised trial<br>BMJ                                                                        | Interventional e.g.<br>randomised trial<br>Quantitative (n= 2416)                 | Condition: Infectious<br>Test: N/A | Overdiagnosis<br>Impact on further testing<br>or treatment i.e.<br>consequence of OD or<br>Overuse of tests<br>Financial Impact: No |

|                                                                                                   |                                                                                                                                                   |                                                                                    |                                                                  |                                                                                                                                     |
|---------------------------------------------------------------------------------------------------|---------------------------------------------------------------------------------------------------------------------------------------------------|------------------------------------------------------------------------------------|------------------------------------------------------------------|-------------------------------------------------------------------------------------------------------------------------------------|
| Reyburn H et al<br>2004<br>Tanzania, Lower<br>middle income                                       | Overdiagnosis of malaria in patients with<br>severe febrile illness in Tanzania: a<br>prospective study<br>BMJ                                    | Observational e.g. cohort<br>or cross-sectional studies<br>Quantitative (n= 17313) | Condition: Infectious<br>Test: N/A                               | Overdiagnosis<br>Impact on further testing<br>or treatment i.e.<br>consequence of OD or<br>Overuse of tests<br>Financial Impact: No |
| Salgado MV et al<br>2016<br>Argentina, Upper<br>middle income                                     | Sobreuso de mamografía para rastreo en<br>un hospital académico de Buenos Aires<br>Rev argent salud publica                                       | Observational e.g. cohort<br>or cross-sectional studies<br>Quantitative (n= 399)   | Condition: Cancer<br>Test: Imaging -<br>Mammography              | Overuse of tests<br>Overdiagnosis or Overuse<br>of tests estimation<br>Financial Impact:                                            |
| Samarakoon Y et al<br>2018<br>Sri Lanka, Lower<br>middle income                                   | Appropriateness of colonoscopy according<br>to EPAGE II in a low resource setting: a<br>cross sectional study from Sri Lanka<br>BMC Gastroenterol | Observational e.g. cohort<br>or cross-sectional studies<br>Quantitative (n= 325)   | Condition: N/A<br>Test: Procedure - GI<br>Endoscopy, colonoscopy | Overuse of tests<br>Overdiagnosis or Overuse<br>of tests estimation<br>Financial Impact: No                                         |
| Sator L et al 2019<br>Turkey, South Africa,<br>China, Nigeria,<br>Phillipines, India,<br>Tunisia, | Overdiagnosis of COPD in Subjects With<br>Unobstructed Spirometry: A BOLD Analysis<br>Chest                                                       | Observational e.g. cohort<br>or cross-sectional studies<br>Quantitative (n= 16177) | Condition: Lung<br>Test: N/A                                     | Overdiagnosis<br>Overdiagnosis or Overuse<br>of tests estimation<br>Financial Impact: No                                            |
| Savitha MR et al<br>2008<br>India, Lower middle<br>income                                         | Redefining the World Health Organization<br>algorithm for diagnosis of pneumonia with<br>simple additional markers<br>Indian J Pediatr            | Observational e.g. cohort<br>or cross-sectional studies<br>Quantitative (n= 50)    | Condition: Infectious<br>Test: N/A                               | Overdiagnosis<br>Impact on further testing<br>or treatment i.e.<br>consequence of OD or<br>Overuse of tests<br>Financial Impact: No |



|                                                     |                                                                                                                                                                                                |                                                                                |                                                          |                                                                                                                                                                                                                                                                        |
|-----------------------------------------------------|------------------------------------------------------------------------------------------------------------------------------------------------------------------------------------------------|--------------------------------------------------------------------------------|----------------------------------------------------------|------------------------------------------------------------------------------------------------------------------------------------------------------------------------------------------------------------------------------------------------------------------------|
| Schmulson MJ 2008<br>Mexico, Upper middle income    | [Limited diagnostic testing can decrease the direct economic impact of irritable bowel syndrome]<br>Rev Med Chil                                                                               | Observational e.g. cohort or cross-sectional studies<br>quantitative (n= 98)   | Condition: GIT<br>Test: N/A                              | Overdiagnosis<br>Impact on further testing or treatment i.e. consequence of OD or Overuse of tests<br>Financial Impact: Limited diagnostic testing recommended by the LATAM Consensus for IBS can significantly decrease the economic impact of this disease in Mexico |
| Sibai AM et al 2008<br>Lebanon, Upper middle income | The appropriateness of use of coronary angiography in Lebanon: implications for health policy<br>Health Policy Plan                                                                            | Observational e.g. cohort or cross-sectional studies<br>Quantitative (n= 5418) | Condition: N/A<br>Test: Procedure - Coronary angiography | Overuse of tests<br>Overdiagnosis or Overuse of tests estimation<br>Financial Impact: No                                                                                                                                                                               |
| Sievers AC et al 2008<br>Rwanda, Low income         | Reduced paediatric hospitalizations for malaria and febrile illness patterns following implementation of a community-based malaria control programme in rural Rwanda<br>World Hosp Health Serv | Observational e.g. cohort or cross-sectional studies<br>Quantitative (n= 551)  | Condition: Infectious<br>Test: N/A                       | Overdiagnosis<br>Impact on further testing or treatment i.e. consequence of OD or Overuse of tests<br>Financial Impact: No                                                                                                                                             |
| Silva HS et al 2019<br>Brazil, Upper middle income  | Abdominal Computed Tomography in the Emergency Room: Overuse of Medical Technologies and the Depreciation of Clinical Diagnosis<br>Rev bras educ méd                                           | Observational e.g. cohort or cross-sectional studies<br>Qualitative (n= 834)   | Condition: N/A<br>Test: Imaging - CT                     | Overuse of tests<br>Overdiagnosis or Overuse of tests estimation<br>Financial Impact:                                                                                                                                                                                  |

|                                                       |                                                                                                                                                                                                    |                                                                                |                                      |                                                                                                                    |
|-------------------------------------------------------|----------------------------------------------------------------------------------------------------------------------------------------------------------------------------------------------------|--------------------------------------------------------------------------------|--------------------------------------|--------------------------------------------------------------------------------------------------------------------|
| Skarbinski J et al 2009<br>Kenya, Lower middle income | Effect of malaria rapid diagnostic tests on the management of uncomplicated malaria with artemether-lumefantrine in Kenya: a cluster randomized trial<br>Am J Trop Med Hyg                         | Interventional e.g. randomised trial<br>Quantitative (n= 1540)                 | Condition: Infectious<br>Test: N/A   | Both<br>Impact on further testing or treatment i.e. consequence of OD or Overuse of tests<br>Financial Impact: No  |
| SM AE et al 2009<br>Sudan, Low income                 | Malaria overdiagnosis and burden of malaria misdiagnosis in the suburbs of central Sudan: special emphasis on artemisinin-based combination therapy era<br>Diagn Microbiol Infect Dis              | Observational e.g. cohort or cross-sectional studies<br>Quantitative (n= 3613) | Condition: Infectious<br>Test: N/A   | Both<br>Impact on further testing or treatment i.e. consequence of OD or Overuse of tests<br>Financial Impact: Yes |
| Sodhi KS et al 2015<br>India, Lower middle income     | Clinical application of 'Justification' and 'Optimization' principle of ALARA in pediatric CT imaging: "How many children can be protected from unnecessary radiation?"<br>Eur J Radiol            | Observational e.g. cohort or cross-sectional studies<br>quantitative (n= 1302) | Condition: N/A<br>Test: Imaging - CT | Overuse of tests<br>Overdiagnosis or Overuse of tests estimation<br>Financial Impact:                              |
| Sonkar SC et al 2016<br>India, Lower middle income    | Comparative analysis of syndromic and PCR-based diagnostic assay reveals misdiagnosis/ overtreatment for trichomoniasis based on subjective judgment in symptomatic patients<br>Infect Dis Poverty | Diagnostic Test Accuracy<br>Quantitative (n= 820)                              | Condition: Infectious<br>Test: N/A   | Both<br>Impact on further testing or treatment i.e. consequence of OD or Overuse of tests<br>Financial Impact: No  |

|                                                     |                                                                                                                                                                                                                                |                                                                                |                                                               |                                                                                                                            |
|-----------------------------------------------------|--------------------------------------------------------------------------------------------------------------------------------------------------------------------------------------------------------------------------------|--------------------------------------------------------------------------------|---------------------------------------------------------------|----------------------------------------------------------------------------------------------------------------------------|
| Steinhardt LC et al 2014<br>Malawi, Low income      | Patient-, health worker-, and health facility-level determinants of correct malaria case management at publicly funded health facilities in Malawi: results from a nationally representative health facility survey<br>Malar J | Observational e.g. cohort or cross-sectional studies<br>Quantitative (n= 2155) | Condition: Infectious<br>Test: N/A                            | Overdiagnosis<br>Impact on further testing or treatment i.e. consequence of OD or Overuse of tests<br>Financial Impact: No |
| Tachi K et al 2011<br>Ghana, Lower middle income    | Appropriateness and diagnostic yield of referrals for oesophagogastroduodenoscopy at the Korle Bu Teaching Hospital<br>West Afr J Med                                                                                          | Observational e.g. cohort or cross-sectional studies<br>Quantitative (n= 375)  | Condition: N/A<br>Test: Procedure - GI Endoscopy              | Overuse of tests<br>Overdiagnosis or Overuse of tests estimation<br>Financial Impact: No                                   |
| Tambe J et al 2020<br>Cameroon, Lower middle income | Multidetector computed tomography utilization in an urban sub-Saharan Africa setting: user characteristics, indications and appropriateness<br>Pan Afr Med J                                                                   | Observational e.g. cohort or cross-sectional studies<br>Quantitative (n= 511)  | Condition: N/A<br>Test: Imaging - CT                          | Overuse of tests<br>Overdiagnosis or Overuse of tests estimation<br>Financial Impact: No                                   |
| Tan YM et al 2004<br>Malaysia, Upper middle income  | Appropriateness of colonoscopy in a university hospital<br>Med J Malaysia                                                                                                                                                      | Observational e.g. cohort or cross-sectional studies<br>Quantitative (n= 499)  | Condition: N/A<br>Test: Procedure - GI Endoscopy, colonoscopy | Overuse of tests<br>Overdiagnosis or Overuse of tests estimation<br>Financial Impact: No                                   |

|                                                             |                                                                                                                                                                                           |                                                                               |                                      |                                                                                                                            |
|-------------------------------------------------------------|-------------------------------------------------------------------------------------------------------------------------------------------------------------------------------------------|-------------------------------------------------------------------------------|--------------------------------------|----------------------------------------------------------------------------------------------------------------------------|
| Tawiah T et al 2016<br>Ghana, Lower middle income           | Cost-Effectiveness Analysis of Test-Based versus Presumptive Treatment of Uncomplicated Malaria in Children under Five Years in an Area of High Transmission in Central Ghana<br>PLoS One | Interventional e.g. randomised trial<br>Quantitative (n= 3046)                | Condition: Infectious<br>Test: N/A   | Both<br>Impact on further testing or treatment i.e. consequence of OD or Overuse of tests<br>Financial Impact: Yes         |
| Timire C et al 2019<br>Zimbabwe, Lower middle income        | Targeted active screening for tuberculosis in Zimbabwe: are field digital chest X-ray ratings reliable?<br>Public Health Action                                                           | Observational e.g. cohort or cross-sectional studies<br>Quantitative (n= 230) | Condition: Infectious<br>Test: N/A   | Overdiagnosis<br>Impact on further testing or treatment i.e. consequence of OD or Overuse of tests<br>Financial Impact: No |
| Torres-Castro I et al 2011<br>Colombia, Upper middle income | [Lipid profile frequency and relevancy as an initial test for peripheral vertigo]<br>Rev Salud Publica (Bogota)                                                                           | Observational e.g. cohort or cross-sectional studies<br>Quantitative (n= 201) | Condition: Others<br>Test: Pathology | Overuse of tests<br>Overdiagnosis or Overuse of tests estimation<br>Financial Impact: Yes                                  |

|                                                                                                                                                                                                                                                |                                                                                                                                                                                                                       |                                                                                |                                    |                                                                                                                            |
|------------------------------------------------------------------------------------------------------------------------------------------------------------------------------------------------------------------------------------------------|-----------------------------------------------------------------------------------------------------------------------------------------------------------------------------------------------------------------------|--------------------------------------------------------------------------------|------------------------------------|----------------------------------------------------------------------------------------------------------------------------|
| Vaccarella S et al 2021<br>Ukraine, Russia, Bulgaria, Turkey, China, Thailand, Vietnam, Jordan, Philippines, India, Pakistan, Puerto Rico, Colombia, Peru, Costa Rica, Ecuador, Cuba, Argentina, Morocco, Algeria, Egypt, Kenya, Mali, Uganda, | Global patterns and trends in incidence and mortality of thyroid cancer in children and adolescents: a population-based study<br>Lancet Diabetes Endocrinol                                                           | Observational e.g. cohort or cross-sectional studies<br>Quantitative (n= 8049) | Condition: Cancer<br>Test: N/A     | Overdiagnosis<br>Overdiagnosis or Overuse of tests estimation<br>Financial Impact: No                                      |
| Van Dillen J et al 2007<br>Namibia, Upper middle income                                                                                                                                                                                        | Overdiagnosis of malaria in hospitalized patients in Namibia<br>Trop Doct                                                                                                                                             | Observational e.g. cohort or cross-sectional studies<br>Quantitative (n= 176)  | Condition: Infectious<br>Test: N/A | Overdiagnosis<br>Impact on further testing or treatment i.e. consequence of OD or Overuse of tests<br>Financial Impact: No |
| Vassilakos P et al 2021<br>Cameroon, Lower middle income                                                                                                                                                                                       | A cross-sectional study exploring triage of human papillomavirus (HPV)-positive women by visual assessment, manual and computer-interpreted cytology, and HPV-16/18-45 genotyping in Cameroon<br>Int J Gynecol Cancer | Diagnostic Test Accuracy<br>Quantitative (n= 1598)                             | Condition: Cancer<br>Test: N/A     | Both<br>Impact on further testing or treatment i.e. consequence of OD or Overuse of tests<br>Financial Impact: No          |
| Veedu JS et al 2019<br>India, Lower middle income                                                                                                                                                                                              | Overdiagnosis of thyroid cancer: A problem of greater access to healthcare<br>Anticancer Research                                                                                                                     | Observational e.g. cohort or cross-sectional studies<br>Quantitative (n= N/A)  | Condition: Cancer<br>Test: N/A     | Overdiagnosis<br>Overdiagnosis or Overuse of tests estimation<br>Financial Impact: No                                      |

|                                                                                           |                                                                                                                                                                                      |                                                                                 |                                         |                                                                                                                            |
|-------------------------------------------------------------------------------------------|--------------------------------------------------------------------------------------------------------------------------------------------------------------------------------------|---------------------------------------------------------------------------------|-----------------------------------------|----------------------------------------------------------------------------------------------------------------------------|
| Velicković JV et al 2013<br>Serbia, Upper middle income                                   | Routine chest radiographs in the surgical intensive care unit: can we change clinical habits with no proven benefit?<br>Acta Chir Iugosl                                             | Observational e.g. cohort or cross-sectional studies<br>Quantitative (n= 97)    | Condition: N/A<br>Test: Imaging - X-ray | Overuse of tests<br>Overdiagnosis or Overuse of tests estimation<br>Financial Impact: No                                   |
| Visser T et al 2017<br>Liberia, Ghana, Myanmar, Uganda, Tanzania, Nigeria, Kenya, Zambia, | Introducing malaria rapid diagnostic tests in private medicine retail outlets: A systematic literature review<br>PLoS One                                                            | Review<br>Quantitative (n= N/A)                                                 | Condition: Infectious<br>Test: N/A      | Overdiagnosis<br>Impact on further testing or treatment i.e. consequence of OD or Overuse of tests<br>Financial Impact: No |
| Xie M et al 2020<br>China , Upper middle income                                           | Impacts of Different Spirometry Reference Equations and Diagnostic Criteria on the Frequency of Airway Obstruction in Adult People of North China<br>Int J Chron Obstruct Pulmon Dis | Observational e.g. cohort or cross-sectional studies<br>Quantitative (n= )      | Condition: Lung<br>Test: N/A            | Overdiagnosis<br>Overdiagnosis or Overuse of tests estimation<br>Financial Impact: No                                      |
| Xu Y et al 2016<br>China, Upper middle income                                             | Plasma glucose and hemoglobin A1c for the detection of diabetes in Chinese adults<br>J Diabetes                                                                                      | Observational e.g. cohort or cross-sectional studies<br>Quantitative (n= 98658) | Condition: Diabetes<br>Test: N/A        | Overdiagnosis<br>Overdiagnosis or Overuse of tests estimation<br>Financial Impact: No                                      |

|                                                     |                                                                                                                                                             |                                                                                  |                                                   |                                                                                           |
|-----------------------------------------------------|-------------------------------------------------------------------------------------------------------------------------------------------------------------|----------------------------------------------------------------------------------|---------------------------------------------------|-------------------------------------------------------------------------------------------|
| Yilmaz FM et al 2016<br>Turkey, Upper middle income | Impact of laboratory test use strategies in a Turkish hospital<br>PLOS One                                                                                  | Observational e.g. cohort or cross-sectional studies<br>Quantitative (n= 480000) | Condition: N/A<br>Test: Pathology                 | Overuse of tests<br>Potential Solutions<br>Financial Impact: Yes                          |
| Zhang H et al 2018<br>China, Upper middle income    | Extent and cost of inappropriate use of tumour markers in patients with pulmonary disease: a multicentre retrospective study in Shanghai, China<br>BMJ Open | Observational e.g. cohort or cross-sectional studies<br>Quantitative (n= 2706)   | Condition: Lung<br>Test: Pathology - Tumor marker | Overuse of tests<br>Overdiagnosis or Overuse of tests estimation<br>Financial Impact: Yes |
| Zhao J et al 2017<br>China , Upper middle income    | Risk assessment models to evaluate the necessity of prostate biopsies in North Chinese patients with 4-50 ng/mL PSA<br>Oncotarget                           | Observational e.g. cohort or cross-sectional studies<br>Quantitative (n= 702)    | Condition: Cancer<br>Test: N/A                    | Overuse of tests<br>Potential Solutions<br>Financial Impact: No                           |
